1  
2  
3  
4  
5  
6  
7  
8  
9  
10  
11  
12  
13  
14  
15  
16  
17  
18  
19  
20  
21  
22  
23  
24  
25  
26  
27  
28  
29  
30  
31  
32  
33  
34  
35  
36  
37  
38  
39  
40  
41  
42  
43  
44  
45  
46  
47  
48

## Multiple domains in ARHGAP36 regulate PKA degradation and Gli activation

Patricia R. Nano<sup>1</sup>, Takamasa Kudo<sup>1</sup>, Nancie A. Mooney<sup>2</sup>,  
Jun Ni<sup>1,5</sup>, Janos Demeter<sup>2</sup>, Peter K. Jackson<sup>2</sup>, and James K. Chen<sup>1,3,4,\*</sup>

<sup>1</sup>Department of Chemical and Systems Biology, Stanford University School of Medicine, Stanford, CA

<sup>2</sup>Department of Microbiology and Immunology, Stanford University School of Medicine, Stanford, CA

<sup>3</sup>Department of Developmental Biology, Stanford University School of Medicine, Stanford, CA

<sup>4</sup>Department of Chemistry, Stanford University, Stanford, CA

<sup>5</sup>Present address: Brain Science and Advanced Technology Institute, Wuhan University of Science and Technology, Wuhan, China

\* Correspondence should be addressed to J.K.C. ([jameschen@stanford.edu](mailto:jameschen@stanford.edu))

49 **ABSTRACT**

50 ARHGAP36 is a Rho GTPase-activating protein (GAP) family member that contributes to  
51 spinal cord development and tumorigenesis. This multidomain protein is composed of splicing-  
52 dependent N-terminal sequences, the GAP-like region, and a unique C-terminal domain, and an  
53 N-terminal arginine-rich region has been shown to suppress protein kinase A (PKA) and activate  
54 Gli transcription factors. To understand how these structural elements act in concert, we have  
55 mapped the ARHGAP36 structure-activity landscape with domain- and amino-acid-level  
56 resolution. ARHGAP36-mediated Gli activation can be repressed by N-terminal sequences that  
57 regulate subcellular ARHGAP36 localization and PKA targeting. The GAP-like and C-terminal  
58 domains counteract this autoinhibitory mechanism and promote ARHGAP36 trafficking to the  
59 plasma membrane and primary cilium, respectively. The GAP-like domain may also conditionally  
60 suppress the arginine-rich region, and it modulates ARHGAP36 binding to the prolyl  
61 oligopeptidase-like protein PREPL and the E3 ubiquitin ligase PRAJA2. These domain-dependent  
62 activities provide a potential means for tissue-specific ARHGAP36 functions.

63

## 69 INTRODUCTION

70 Gli transcription factors (Gli1-3) are essential regulators of cell proliferation and  
71 differentiation, controlling fate specification in the neural tube (*Briscoe, et al., 2000; Stamatakis, et*  
72 *al., 2005*) and limb bud (*Hill, et al., 2009; te Welscher, et al., 2002*) and the maintenance of granule  
73 neuron precursors in the developing cerebellum (*Lewis, et al., 2004; Wallace, 1999; Wechsler-*  
74 *Reya, et al., 2001*). Accordingly, misregulation of Gli activity can lead to uncontrolled cell growth,  
75 resulting in basal cell carcinoma, medulloblastoma, and other human cancers (*Hui, et al., 2011*).  
76 Gli functions are primarily regulated by the Hedgehog (Hh) pathway, and in the absence of Hh  
77 ligands, GLI2 and GLI3 are bound to the scaffolding protein Suppressor of Fused (SUFU) (*Stone,*  
78 *et al., 1999; Wang, Chengbing, et al., 2010*), which promotes their sequential phosphorylation by  
79 protein kinase A (PKA), glycogen synthase kinase  $\beta$  (GSK3 $\beta$ ), and casein kinase 1 (CK1) (*Pan,*  
80 *et al., 2006; Pan, et al., 2007; Tempe, et al., 2006; Wang, Baolin, et al., 2006*). Proteasomal  
81 machinery is then recruited to the phosphorylated Gli proteins, resulting in GLI2 degradation and  
82 proteolytic conversion of GLI3 into a transcriptional repressor (*Pan, et al., 2007*).

83 Hh ligands suppress these intracellular processes, acting via the transmembrane  
84 receptors Patched1 (PTCH1) and Smoothed (SMO). Through mechanisms that remain  
85 unclear, SMO promotes the dissociation of GLI2 and GLI3 from SUFU, uncoupling the  
86 transcription factors from proteasomal regulation and allowing the full-length proteins to become  
87 transcriptional activators (*Humke, et al., 2010; Tukachinsky, et al., 2010*). SMO activity is  
88 suppressed by PTCH1 (*Murone, et al., 1999; Rohatgi, et al., 2007; Taipale, J., et al., 2002*), which  
89 is in turn directly inhibited by Hh ligands (*Incardona, et al., 2000; Stone, et al., 1996*). Hh signaling  
90 therefore induces SMO activation and the expression of Hh target genes, including those that  
91 encode PTCH1 (*Ågren, et al., 2004*) and the constitutively active transcription factor GLI1 (*Bai, et*  
92 *al., 2004; Dai, et al., 1999*). The primary cilium serves a key center for these signaling events  
93 (*Dorn, et al., 2012; Haycraft, et al., 2005; Kim, et al., 2009; May, et al., 2005; Rohatgi, et al., 2007;*

94 Wang, Yu, et al., 2009; Wen, et al., 2010), and this cell-surface protrusion is required for both Gli  
95 activator and repressor formation (Huangfu, et al., 2005; Liu, Aimin, et al., 2005).

96 In addition to these signal transduction mechanisms, there is growing evidence for non-  
97 canonical Gli regulation in both normal physiology (Dennler, et al., 2007; Flora, et al., 2009; Riobó,  
98 et al., 2006) and in cancer (Beauchamp, et al., 2009; Dennler, et al., 2007; Elswa, et al., 2011;  
99 Han, et al., 2015; Kasper, et al., 2006; Liu, Z., et al., 2014; Long, et al., 2014). Our laboratory  
100 previously established ARHGAP36 as a non-canonical Gli activator that acts in a SMO-  
101 independent manner (Rack, et al., 2014). We identified this Rho GTPase-activating protein (GAP)  
102 family member in a genome-scale screen for Hh pathway agonists (Rack, et al., 2014), and  
103 subsequent studies have uncovered an essential role for ARHGAP36 in the specification of lateral  
104 motor column neurons (Nam, et al., 2019; Rack, et al., 2014). Endogenous *Arhgap36* transcription  
105 in the developing mouse spinal cord coincides with Hh pathway activation, and its overexpression  
106 leads to ectopic induction of the Hh target genes *Ptch1* and *Gli1* (Nam, et al., 2019). In addition,  
107 *Arhgap36* expression has been found to correlate with SMO inhibitor resistance in Hh pathway-  
108 driven murine medulloblastomas (Buonamici, et al., 2010; Rack, et al., 2014), and upregulating  
109 this Rho GAP family member in neural progenitor cells is sufficient to induce medulloblastomas  
110 in mice (Beckmann, et al., 2019). ARHGAP36 may promote tumor growth through multiple  
111 mechanisms, as elevated *ARHGAP36* expression also has been associated with Hh pathway-  
112 independent subtypes of medulloblastoma and neuroblastoma (Beckmann, et al., 2019; Lee, et  
113 al., 2019).

114 Despite the emerging importance of ARHGAP36 in neuronal development and cancer, the  
115 biochemical and cellular mechanisms that regulate and transduce its activity are not well  
116 understood. The ARHGAP36 protein consists of unique N- and C-terminal domains and a central  
117 region that is homologous to Rho GAPs. In addition, the five annotated isoforms of human  
118 ARHGAP36 have varying N-terminal structures due to alternative splicing (Figure 1A). Four of the

119 ARHGAP36 isoforms can activate Gli proteins, with the gene product harboring the longest N-  
120 terminal domain (isoform 1) being the sole exception (*Rack, et al., 2014*). Isoform 1 is also the  
121 only ARHGAP36 protein that does not localize to the plasma membrane, and it instead adopts a  
122 perinuclear distribution (*Müller, et al., 2020; Rack, et al., 2014*). In addition, the shortest  
123 ARHGAP36 protein (isoform 3) accumulates in the primary cilium, whereas other ARHGAP36  
124 isoforms cannot be detected in this signaling center under steady-state conditions (*Rack, et al.,*  
125 *2014*). More recently, it has been shown that an N-terminal arginine-rich motif conserved in all  
126 human ARHGAP36 isoforms can bind directly to catalytic subunits of PKA (PRKACA and  
127 PRKACB; henceforth referred to as PKA<sub>cat</sub>) (*Eccles, et al., 2016*). In the context of isoform 2, this  
128 motif mediates the degradation of PKA<sub>cat</sub>, and a 77-amino-acid N-terminal fragment that includes  
129 this arginine-rich region has been shown to be necessary and sufficient for cellular PKA<sub>cat</sub>  
130 depletion (*Eccles, et al., 2016*). These findings suggest a role for N-terminal sequences in  
131 targeting ARHGAP36 to specific subcellular compartments and establish PKA<sub>cat</sub> inhibition as a  
132 potential basis for ARHGAP36-mediated Gli activation.

133 In comparison, the functions of the GAP-like and C-terminal domains in ARHGAP36 have  
134 not yet been elucidated. Rho GAP family members typically attenuate the function of Rho  
135 GTPases by stimulating GTP hydrolysis (*Moon, 2003*). However, the GAP-like region in  
136 ARHGAP36 lacks the “arginine finger” motif conserved in catalytically active homologs (*Rack, et*  
137 *al., 2014; Scheffzek, et al., 1998*), and ARHGAP36 has no effect on the activities of Rac1, Cdc42,  
138 and Rho A (*Müller, et al., 2020*). In addition, ARHGAP36 residues that are structurally equivalent  
139 to those previously associated with Rho GAP-catalyzed GTP hydrolysis are not required for  
140 ARHGAP36-mediated Gli activation (*Rack, et al., 2014*). Non-catalytic mechanisms have been  
141 reported for several Rho GAP family members (*Amin, et al., 2016; Faucherre, et al., 2003;*  
142 *Marchesi, et al., 2014*), and it is possible that the GAP-like domain in ARHGAP36 similarly  
143 interacts with Rho GTPases or other signaling proteins in a stoichiometric manner. How the C-

144 terminal domain might contribute to ARHGAP36 function is even more enigmatic since it lacks  
145 sequence homology with other proteins.

146         Deciphering the molecular and cellular mechanisms that regulate ARHGAP36 activity  
147 requires a deeper understanding of the relationship between ARHGAP36 structure and function.  
148 Here we describe our systematic mapping of the ARHGAP36 structure-activity landscape using  
149 individual ARHGAP36 isoforms, truncated variants, and a high-throughput mutagenesis screen.  
150 Our findings demonstrate that ARHGAP36-dependent Gli activation and cellular PKA<sub>cat</sub> depletion  
151 are separable activities and reveal isoform-specific differences in subcellular PKA<sub>cat</sub> targeting.  
152 While the ARHGAP36 N-terminal domain is necessary and sufficient for Gli activation, an N-  
153 terminal region in isoform 2 (residues 1-105; N2<sub>1-105</sub>) can inhibit this function and suppress protein  
154 localization to the plasma membrane. This autoinhibitory mechanism is counteracted by the GAP-  
155 like and C-terminal domains, which promote ARHGAP36 recruitment to the plasma membrane  
156 and primary cilium, respectively. Finally, we have discovered several residues within the GAP-  
157 like domain that are necessary for Gli activation by full-length ARHGAP36 isoforms. These  
158 residues are predicted to cluster within the GAP-like domain structure, at a site distal to the Rho  
159 GTPase-binding pocket, and they are required for ARHGAP36 recruitment to the plasma  
160 membrane. We have also leveraged these mutants to discover factors that bind specifically to the  
161 wild-type protein, identifying potential mediators of ARHGAP36 function. Taken together, our work  
162 supports a model in which ARHGAP36 activity state, subcellular localization, and effector binding  
163 are regulated by structural elements distributed throughout protein. In combination with the  
164 differential expression of ARHGAP36 isoforms, such mechanisms could allow ARHGAP36 to  
165 control Gli activity and other PKA<sub>cat</sub>-regulated processes in a tissue-specific manner.

166

## 167 RESULTS

### 168 *Gli* activation and cellular PKA<sub>cat</sub> depletion are separable ARHGAP36 functions

169 To explore the relationship between ARHGAP36-mediated *Gli* activation and PKA<sub>cat</sub>  
170 degradation, we measured the effect of each human ARHGAP36 isoform on both cellular  
171 processes. Individual isoforms were retrovirally transduced into NIH-3T3 mouse fibroblasts, a  
172 commonly used line for studying Hh signal transduction (*Taipale, J, et al., 2000*) that also exhibits  
173 ARHGAP36 responsiveness (*Eccles, et al., 2016; Rack, et al., 2014*). The resulting levels of *Gli1*  
174 mRNA and PKA<sub>cat</sub> protein were assessed by qRT-PCR and western blot, respectively.  
175 Overexpression of isoforms 2, 4, or 5 was sufficient to activate *Gli* and deplete the cells of PKA<sub>cat</sub>,  
176 while isoform 1 exhibited neither activity (Figure 1B). In contrast, transduction of isoform 3 induced  
177 *Gli1* expression without reducing cellular PKA<sub>cat</sub> levels to a discernable extent. These results  
178 indicate that total PKA<sub>cat</sub> depletion is not required for ARHGAP36-mediated *Gli* activation, raising  
179 the possibility that ARHGAP36 regulates *Gli* proteins by targeting a specific subcellular pool of  
180 PKA<sub>cat</sub> and/or through PKA-independent mechanisms.

181 We investigated these two models by further comparing the activities of ARHGAP36  
182 isoform 3 with those of isoform 2. Using immunofluorescence microscopy, we observed that  
183 isoform 2 globally depleted PKA<sub>cat</sub> in NIH-3T3 cells, corroborating our western blot analyses  
184 (Figure 1C). In contrast, isoform 3 reduced PKA<sub>cat</sub> pools predominantly in the Golgi. These  
185 findings are consistent with the accumulation of isoform 3 in the primary cilium (*Rack, et al., 2014*),  
186 as the cilium base communicates directly with the Golgi through vesicular trafficking (*Pedersen,*  
187 *et al., 2016*). We next examined how the activities of ARHGAP36 isoforms 2 and 3 are affected  
188 by forskolin, an adenylate cyclase agonist that increases cAMP levels and PKA<sub>cat</sub> activity. We  
189 transduced the ARHGAP36 constructs into NIH-3T3 fibroblasts stably expressing a *Gli*-  
190 dependent firefly luciferase reporter (SHH-LIGHT2 cells) (*Taipale, J, et al., 2000*) and treated the  
191 cells with the PKA<sub>cat</sub> activator. Although the isoform 2-expressing cells exhibited almost two-fold

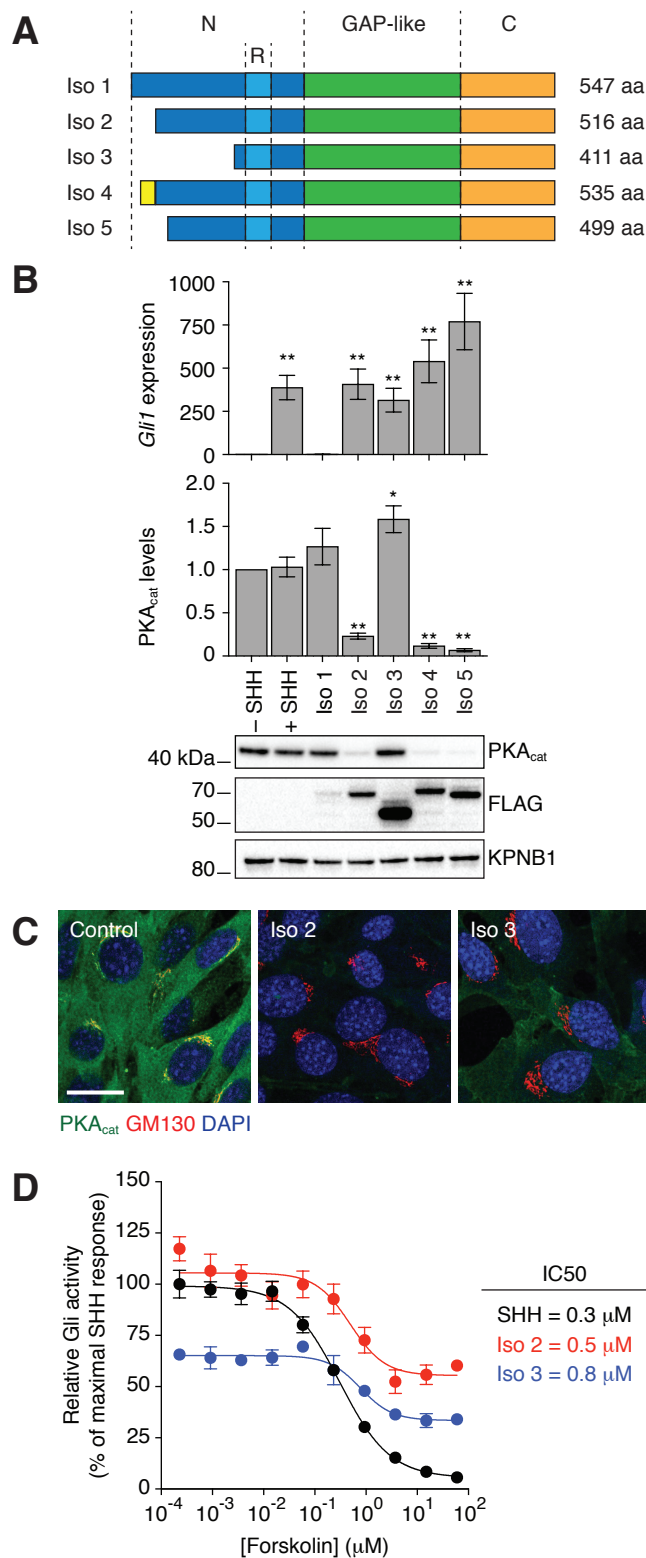

**Figure 1. ARHGAP36 isoforms differentially induce PKA<sub>cat</sub> depletion and Gli activation.** (A) Domain architecture of the five human ARHGAP36 isoforms, with the N-terminal domain (N) shown in dark blue, arginine-rich motif (R) in light blue, GAP-like domain in green, and C-terminal domain (C) in orange. The yellow region indicates an amino acid sequence unique to isoform 4. (B) *Gli1* mRNA and PKA<sub>cat</sub> protein levels in NIH-3T3 cells retrovirally transduced with the indicated FLAG-tagged ARHGAP36 isoforms. Uninfected cells treated with or without Sonic Hedgehog (SHH) ligand were included as positive and negative controls, respectively. Data are the average fold change relative to the negative control for three biological replicates  $\pm$  s.e.m. Single and double asterisks indicate  $P < 0.05$  and  $P < 0.01$ , respectively. A representative western blot for each condition is also shown. (C) PKA<sub>cat</sub> localization in NIH-3T3 cells transduced with FLAG-tagged ARHGAP36 isoform 2 or 3. Representative immunofluorescence micrographs are shown with staining for PKA<sub>cat</sub>, GM130 (cis-Golgi), and DAPI (nucleus). Scale bar: 20  $\mu$ m. (D) Forskolin dose-response curves for SHH-LIGHT2 cells stimulated with SHH or transduced with FLAG-tagged ARHGAP36 isoform 2 or 3. Data are the average Gli reporter activities for at least three biological replicates  $\pm$  s.e.m., normalized to the maximum response in SHH-treated cells.



192 higher Gli reporter activity than those expressing isoform 3, forskolin inhibited Gli function in both  
193 lines with comparable IC50s (Figure 1D). Maximal doses of the PKA<sub>cat</sub> activator also suppressed  
194 about 50% of the Gli reporter activity induced by each isoform. Together, these results  
195 demonstrate that N-terminal sequences in ARHGAP36 can regulate its ability to target PKA<sub>cat</sub> in  
196 specific subcellular compartments and raise the possibility that ARHGAP36 activates Gli proteins  
197 through both PKA<sub>cat</sub>-dependent and -independent mechanisms.

198

199 *ARHGAP36 is autoinhibited by an N-terminal region that is counteracted by the GAP-like and C-*  
200 *terminal domains*

201 We continued to investigate functional differences between ARHGAP36 isoforms 2 and 3  
202 by determining the activities of various truncation mutants (Figure 2A). By retrovirally expressing  
203 these constructs in NIH-3T3 cells, we observed that the N-terminal domain of ARHGAP36  
204 isoform 2 (residues 1-194; N2) is necessary and sufficient for its effects on Gli and PKA<sub>cat</sub>  
205 (Figure 2B) corroborating previous reports (*Eccles, et al., 2016*). However, N2 was less effective  
206 at activating *Gli1* expression than the N-terminal domain of isoform 3 (N3), even though N2 could  
207 induce PKA<sub>cat</sub> degradation. N2 was also markedly less active than full-length isoform 2. In  
208 contrast, N3 and full-length isoform 3 could induce *Gli1* expression to similar extents (Figure 2B).  
209 These results indicate that the N2 region absent in isoform 3 (residues 1-105; N2<sub>1-105</sub>) represses  
210 the Gli-activating function of the remaining N-terminal domain. Moreover, our findings suggest  
211 that ARHGAP36 sequences in the GAP-like and/or C-terminal domains can influence N2<sub>1-105</sub>  
212 function.

213 To discern how the GAP-like and C-terminal domains contribute to ARHGAP36 function,  
214 we examined the activities of N2-GAP and N3-GAP constructs in NIH-3T3 cells. N2-GAP was  
215 moderately more active than N2 with respect to *Gli1* expression, but it was still much less active  
216 than full-length isoform 2 (Figure 2B). N3-GAP activity was comparable to that of N3 and full-

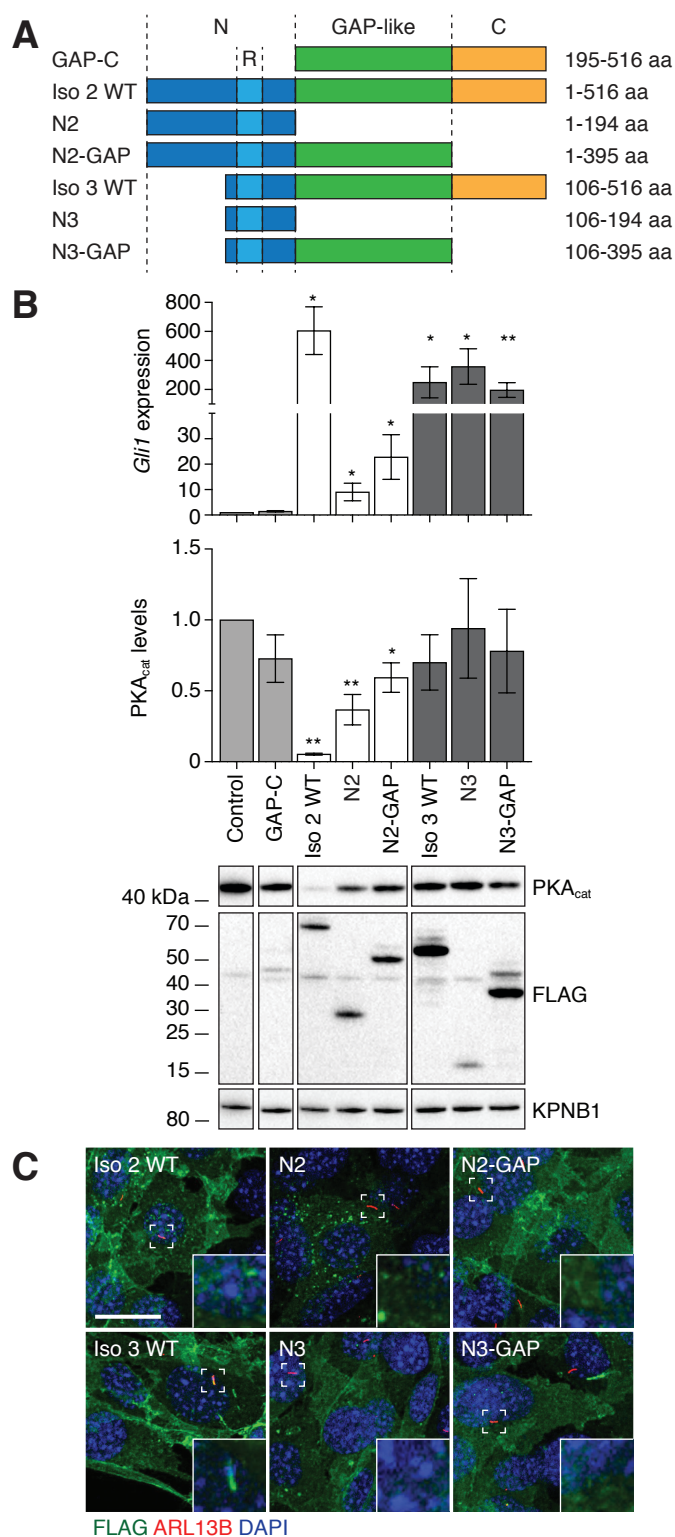

**Figure 2. N-terminal, GAP-like, and C-terminal domains have opposing effects on ARHGAP36 function.** (A) Schematic representation of ARHGAP36 isoform 2 or 3 truncation mutants. Residue numbers are based on the amino acid sequence of isoform 2. (B) *Gli1* mRNA and PKA<sub>cat</sub> protein levels in NIH-3T3 cell retrovirally transduced with the indicated FLAG-tagged ARHGAP36 truncation mutants. Data are the average fold change relative to uninfected cells for three biological replicates  $\pm$  s.e.m. Single and double asterisks indicate  $P < 0.05$  and  $P < 0.01$ , respectively. A representative western blot for each condition is also shown (lanes from the same blot image have been cropped and re-ordered for clarity). (C) Subcellular distributions of the indicated FLAG-tagged ARHGAP36 constructs in NIH-3T3 cells. Representative immunofluorescence micrographs are shown with staining for FLAG, ARL13B (primary cilium) and DAPI (nucleus). Insets highlight ciliated regions in the dashed boxes. Scale bar: 20  $\mu$ m. Images were processed to establish comparable maximum pixel intensities in order to highlight differences in localization.

217 length isoform 3. Thus, both the GAP-like and C-terminal domains can counteract the  
218 autoinhibitory function of N2<sub>1-105</sub>, with the C-terminal region playing a particularly important role.  
219 In the absence of N2<sub>1-105</sub>, ARHGAP36 does not require its GAP-like and C-terminal domains to  
220 achieve high levels of Gli activity.

221 We next sought to determine how the N2<sub>1-105</sub> region, GAP-like domain, and C-terminal  
222 domain regulate ARHGAP36 function. The differing subcellular distributions of full-length  
223 isoforms 2 and 3 indicate that the N2<sub>1-105</sub> region influences ARHGAP36 trafficking (*Rack, et al.,*  
224 *2014*), and we therefore examined the localizations of the truncation mutants. N2 accumulated in  
225 both punctate structures and the plasma membrane, whereas N2-GAP was robustly recruited to  
226 the latter (Figure 2C). In comparison, both N3 and N3-GAP predominantly associated with the  
227 plasma membrane, and unlike the full-length isoform 3, neither construct accumulated in the  
228 primary cilium.

229 These domain-dependent changes in protein localization indicate that N2<sub>1-105</sub> impedes and  
230 the GAP-like domain facilitates ARHGAP36 translocation to the plasma membrane. In principle,  
231 these opposing activities could involve direct interactions between the two regions in ARHGAP36  
232 or parallel functions involving other factors. In addition, the C-terminal domain acts independently  
233 of the N2<sub>1-105</sub> region to promote ciliary accumulation of ARHGAP36. The disparate roles of these  
234 domains in ARHGAP36 trafficking correlate with their divergent effects on Gli activation, providing  
235 further evidence that ARHGAP36 targets specific subcellular compartments to regulate Gli  
236 proteins.

237

### 238 *Identification of ARHGAP36 residues that are required for Gli activation*

239 To characterize these regulatory ARHGAP36 sequences with amino-acid resolution, we  
240 developed a high-throughput mutagenesis screen for ARHGAP36 residues that are essential for  
241 Gli activation (Figure 3A). We used error-prone PCR to create a library of ARHGAP36 isoform 2

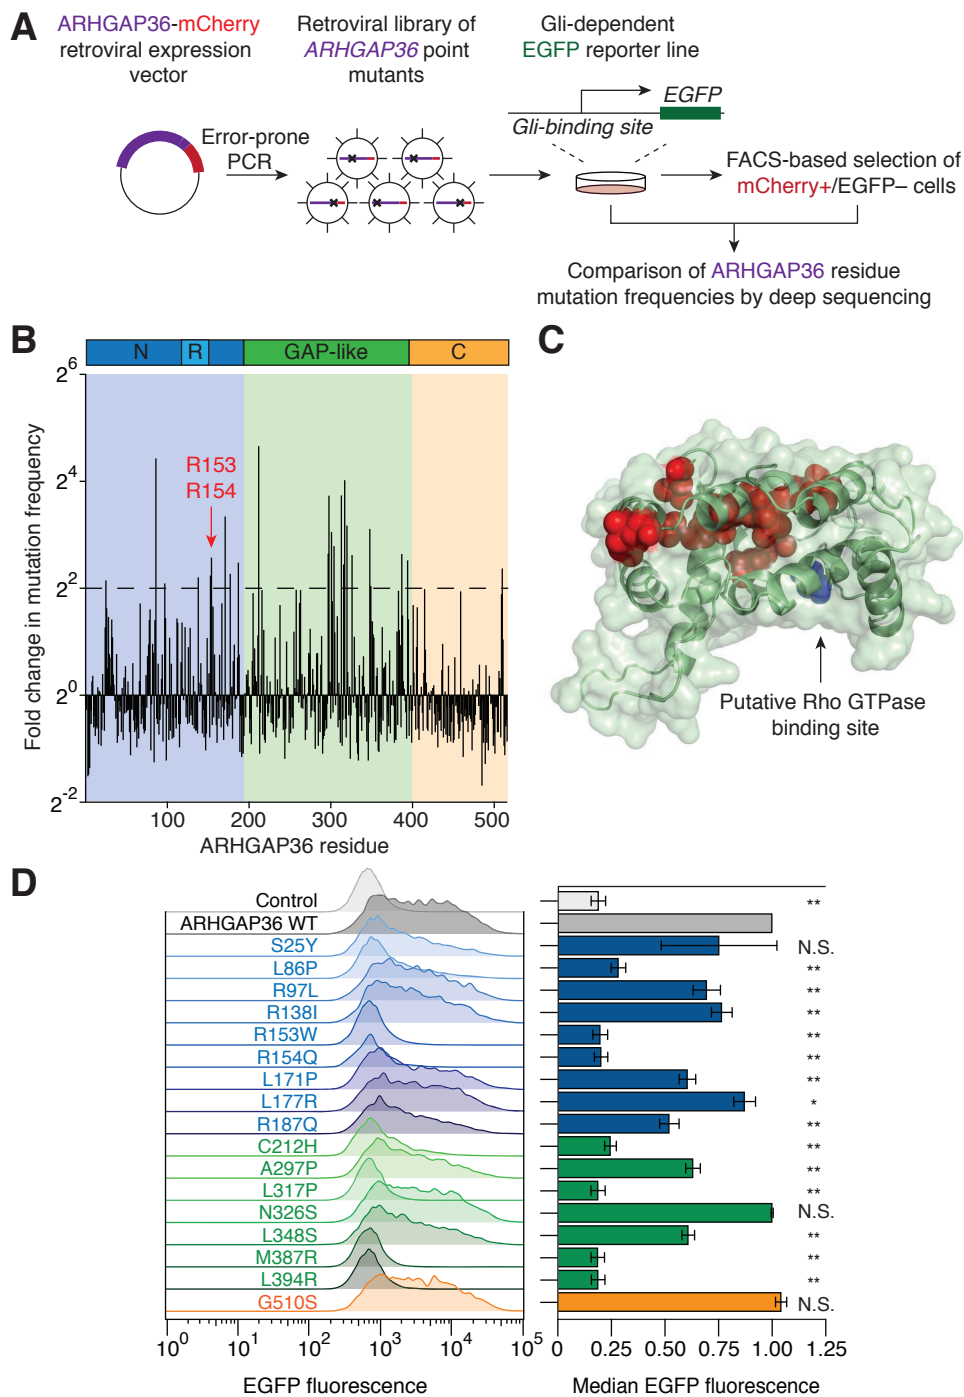

**Figure 3. Identification of essential residues within the N-terminal and GAP-like domains.** (A) Schematic representation of the high-throughput mutagenesis screen used to identify individual residues that contribute to ARHGAP36 function. (B) Histogram depicting the fold change in mutation frequency between pre- and post-selected population for each residue in ARHGAP36. (C) Homology model of the ARHGAP36 GAP-like domain structure based on the crystal structure of  $\beta$ 2-chimaerin (PDB ID: 1xa6). Residues with > 4-fold change in mutation frequency are shown in red, and the site (Thr227) that is structurally equivalent to the arginine finger is shown in blue. (D) Activities of selected ARHGAP36 variants in SHH-EGFP cells, as assessed by flow cytometry-based measurements of Gli reporter fluorescence. The distributions (left) and relative medians (right) of EGFP fluorescence are shown for each ARHGAP36 construct. Data are the average fold change in median EGFP fluorescence relative to that of cells expressing wild-type ARHGAP36 for three biological replicates  $\pm$  s.e.m. Single and double asterisks indicate  $P < 0.05$  and  $P < 0.01$ , respectively.

242 variants C-terminally fused to mCherry, obtaining a collection of approximately 100,000 single  
243 point mutants (27% of all library constructs and 22-fold theoretical coverage of the 4,374 possible  
244 variants). The library was retrovirally transduced into NIH-3T3 fibroblasts expressing a Gli-  
245 dependent green-fluorescent reporter (SHH-EGFP cells) (*Hyman, et al., 2009*) using a multiplicity  
246 of infection (MOI) of 0.3 to maximize the number of cells with single integration events. Cells  
247 expressing full-length ARHGAP36 proteins were then isolated by fluorescence-activated cell  
248 sorting (FACS) according to their mCherry fluorescence. We next cultured these cells under Hh  
249 signaling-competent conditions to allow active ARHGAP36 mutants to induce Gli-dependent  
250 EGFP expression, after which mCherry+/EGFP- cells were isolated by FACS. To ensure that  
251 these ARHGAP36-expressing cells still harbored a functional EGFP reporter, they were  
252 subsequently cultured with the SMO agonist SAG (*Chen, et al., 2002*). The resulting  
253 mCherry+/EGFP+ cells were obtained by FACS, yielding a population of cells expressing putative,  
254 inactive ARHGAP36-mCherry mutants.

255 To identify inactivating point mutations, we used genomic PCR and deep sequencing to  
256 compare the mutation frequency of each amino acid position in the pre- and post-selection  
257 populations. This analysis revealed several residues that could be required for Gli activation,  
258 including two N-terminal arginines (R153 and R154) that were previously shown to be required  
259 for ARHGAP36-mediated PKA<sub>cat</sub> inhibition (Figure 3B, Supplementary File 1) (*Eccles, et al.,*  
260 *2016*). The majority of these putative essential residues were located in the GAP-like region, and  
261 structure homology modeling of this domain predicts that these amino acids cluster together at a  
262 site that is distal to the predicted Rho GTPase binding pocket (Figure 3C). We then used flow  
263 cytometry-based assays to validate a subset of these ARHGAP36 variants, prioritizing residues  
264 that were mutated > 4-fold more frequently in the inactive mutant pool. In these experiments, 17  
265 individual ARHGAP36 mutants were retrovirally transduced into cells at an MOI of 0.3 to  
266 standardize their expression levels. With the exception of S25Y, N326S, and G510S, all of these

267 point mutations significantly decreased ARHGAP36 activity in SHH-EGFP reporter cells  
268 (Figure 3D).

269

### 270 *GAP-like domain mutations disrupt ARHGAP36 recruitment to the plasma membrane*

271 Guided by the results of our mutagenesis screen, we investigated how individual point  
272 mutations might regulate specific aspects of ARHGAP36 function. Our studies focused on the  
273 three residues with the greatest fold change in pre- and post-selection mutation frequencies:  
274 N-terminal domain residue L86 and two sites within the GAP-like domain, C212 and L317  
275 (Figure 4A). We first examined how mutations at these sites affect the ability of ARHGAP36  
276 isoform 2 to induce *Gli1* expression and PKA<sub>cat</sub> degradation in NIH-3T3 cells. All three variants  
277 exhibited diminished *Gli1* expression and PKA<sub>cat</sub> depletion, with the L317P mutation resulting in  
278 complete loss of both ARHGAP36-dependent activities (Figure 4B). We next determined the  
279 effects of these mutations on the subcellular localization of ARHGAP36 isoform 2. The L86P  
280 variant retained the ability to localize to the plasma membrane, but both mutations in the GAP-  
281 like domain rendered ARHGAP36 cytosolic (Figure 4C).

282 To further elaborate the contributions of individual residues to ARHGAP36 trafficking, we  
283 also assessed the localization of other ARHGAP36 point mutants that were inactive in SHH-EGFP  
284 cells (see Figure 3D). The R153W and R154Q variants accumulated in the plasma membrane,  
285 and the GAP-like domain point mutants M387R and L394R remained primarily in the cytosol  
286 (Figure 4 – figure supplement 1). Together, these results provide further evidence that the GAP-  
287 like domain recruits ARHGAP36 to the cell membrane, counteracting the function of N2<sub>1-105</sub>. We  
288 then investigated whether plasma membrane recruitment by the GAP-like domain requires N2<sub>1-105</sub>  
289 or the C-terminal domain, both of which affect ARHGAP36 localization. As in the full-length  
290 isoform 2, C212Y and L317P mutations impeded the ability of N2-GAP to localize to the plasma  
291 membrane and activate Gli proteins (Figure 5A-B). Structurally equivalent mutations (C107Y and

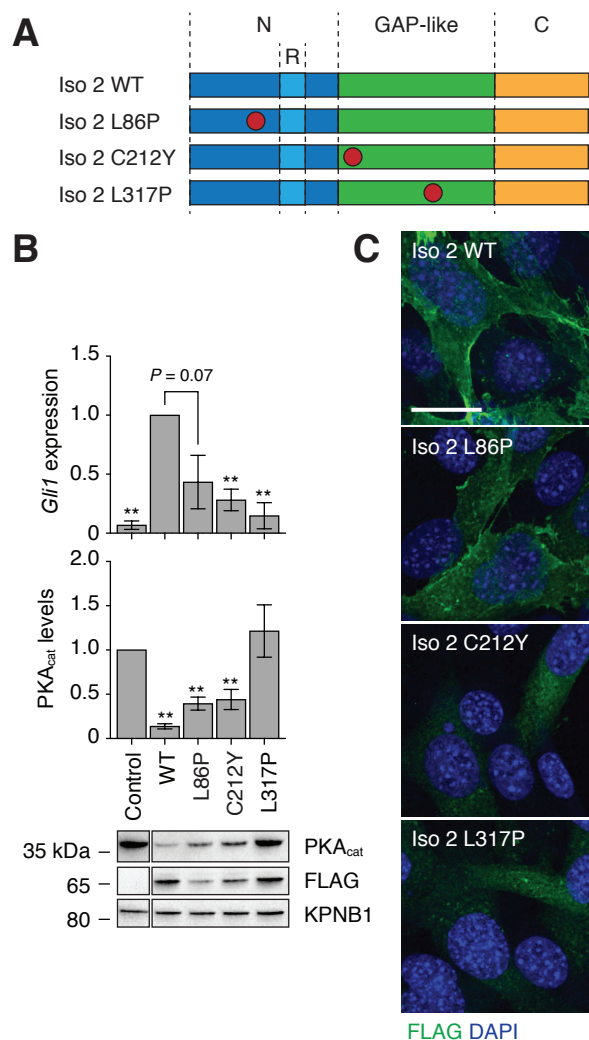

**Figure 4. Point mutations in the GAP-like domain cause ARHGAP36 mislocalization.** (A) Schematic representation of ARHGAP36 isoform 2 point mutants. (B) *Gli1* mRNA and PKA<sub>cat</sub> protein levels in NIH-3T3 cells retrovirally transduced with the indicated FLAG-tagged ARHGAP36 constructs. Uninfected cells were used as controls. Data are the average fold change relative to cells expressing wild-type ARHGAP36 (*Gli1* expression) or to untreated cells (PKA<sub>cat</sub> levels) for three biological replicates  $\pm$  s.e.m. Single and double asterisks indicate  $P < 0.05$  and  $P < 0.01$ , respectively. A representative western blot for each condition is also shown (lanes from the same blot image have been cropped and re-ordered for clarity). (C) Subcellular distributions of the indicated FLAG-tagged ARHGAP36 constructs in NIH-3T3 cells. Representative immunofluorescence micrographs are shown with staining for FLAG and DAPI (nucleus). Scale bar: 20  $\mu$ m.



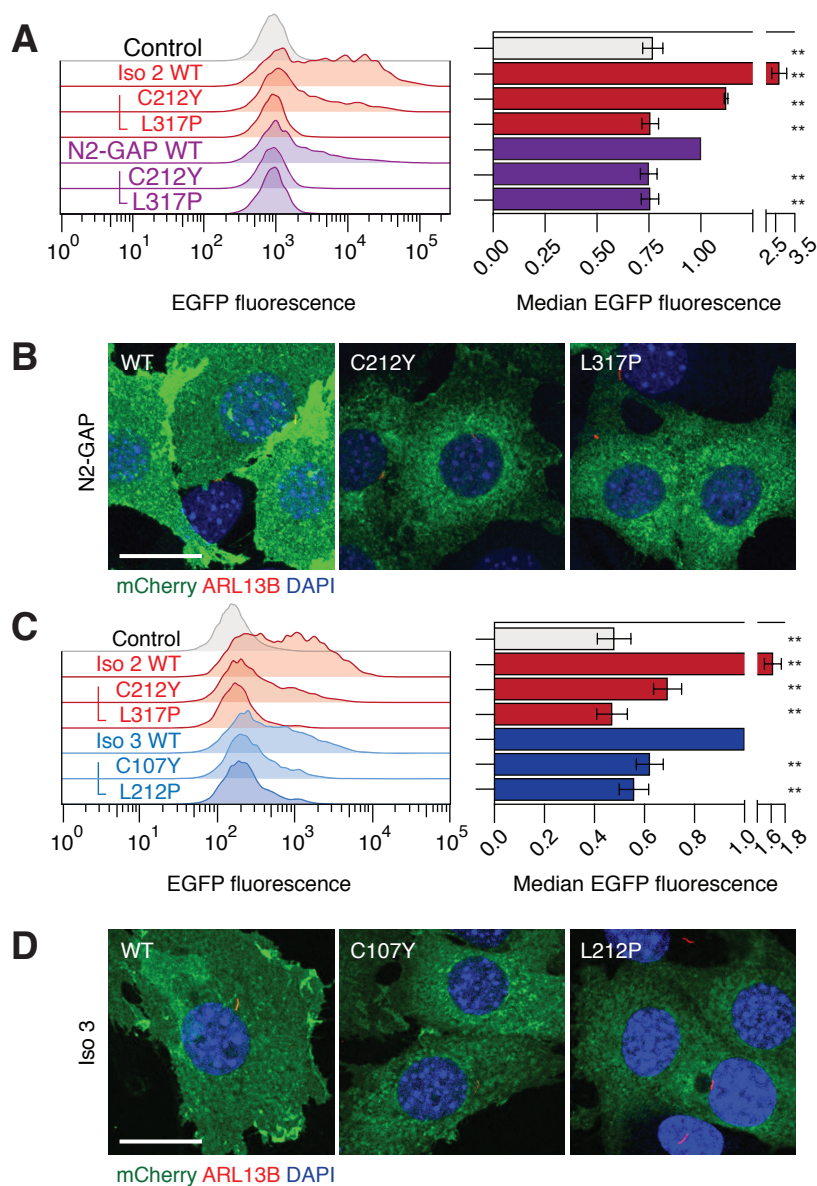

**Figure 5. Point mutations in the GAP-like domain act independently of N21-105 and the C-terminal domain.** (A and C) Effects of GAP-like domain point mutations in N2-GAP- or isoform 3-mediated Gli activation, as assessed in the flow cytometry-based SHH-EGFP assay. The distributions (left) and relative medians (right) of EGFP fluorescence are shown for each ARHGAP36 construct. Data are the average fold change in median EGFP fluorescence relative to that of cells expressing unmutated N2-GAP or isoform 3 for three biological replicates  $\pm$  s.e.m. Double asterisks indicate  $P < 0.01$ . (B and D) Subcellular distributions of the indicated mCherry-tagged ARHGAP36 constructs in SHH-EGFP cells. Representative immunofluorescence micrographs are shown with staining for mCherry, ARL13B (primary cilium), and DAPI (nucleus). Scale bars: 20  $\mu$ m.



292 L212P) in ARHGAP36 isoform 3, which lacks the N2<sub>1-105</sub> region, also rendered the protein  
293 cytosolic and attenuated Gli activation (Figure 5C-D). Thus, the two GAP-like domain mutations  
294 disrupt ARHGAP36 function independently of N2<sub>1-105</sub> and the C-terminal domain.

295

#### 296 *GAP-like domain mutations alter the ARHGAP36 interactome*

297 In addition to uncovering functional roles for specific ARHGAP36 structures, our collection  
298 of inactive variants provided a means for identifying binding proteins that could participate in  
299 ARHGAP36-mediated Gli activation. Toward this goal, we compared the interactomes of wild-  
300 type and L317P ARHGAP36 isoform 2 by retrovirally transducing NIH-3T3 cells with vectors  
301 encoding each ARHGAP36 construct fused to a C-terminal LAP tag (S-peptide-PreScission  
302 protease site-EGFP) (*Ding, et al., 2016; Hsu, et al., 2019; Kanie, et al., 2017; Li, Bin, et al., 2017;*  
303 *Torres, et al., 2009; Wright, et al., 2011*) (Figure 6A). To avoid total PKA<sub>cat</sub> depletion by wild-type  
304 ARHGAP36 in these studies, we also limited the cells to a 4-hour incubation in retroviral medium  
305 and a subsequent 20-hour growth phase. The fibroblasts were then lysed, and each ARHGAP36  
306 construct and its interacting proteins were isolated by tandem affinity purification and  
307 proteolytically digested as previously described (*Ding, et al., 2016; Hsu, et al., 2019; Kanie, et al.,*  
308 *2017; Li, Bin, et al., 2017; Torres, et al., 2009; Wright, et al., 2011*). The resulting peptides were  
309 sequenced and quantified using tandem mass spectrometry, and spectral counts were normalized  
310 to account for variabilities in protein size, LAP tag purification efficiency, and ARHGAP36  
311 expression. Using this approach, we identified 566 putative interactors for wild-type and/or L317P  
312 ARHGAP36 that were observed across three biological replicates (Figure 6B, Supplementary  
313 File 2). PKA<sub>cat</sub> subunits were the only canonical Hh pathway regulators detected in these pulldown  
314 experiments, and they interacted with wild-type and L317P ARHGAP36 to similar extents  
315 (Figure 6B, Figure 6 – figure supplement 1). Eleven proteins preferentially bound to wild-type  
316 ARHGAP36 by at least 5-fold, with prolyl oligopeptidase-like protein PREPL and the E3 ubiquitin

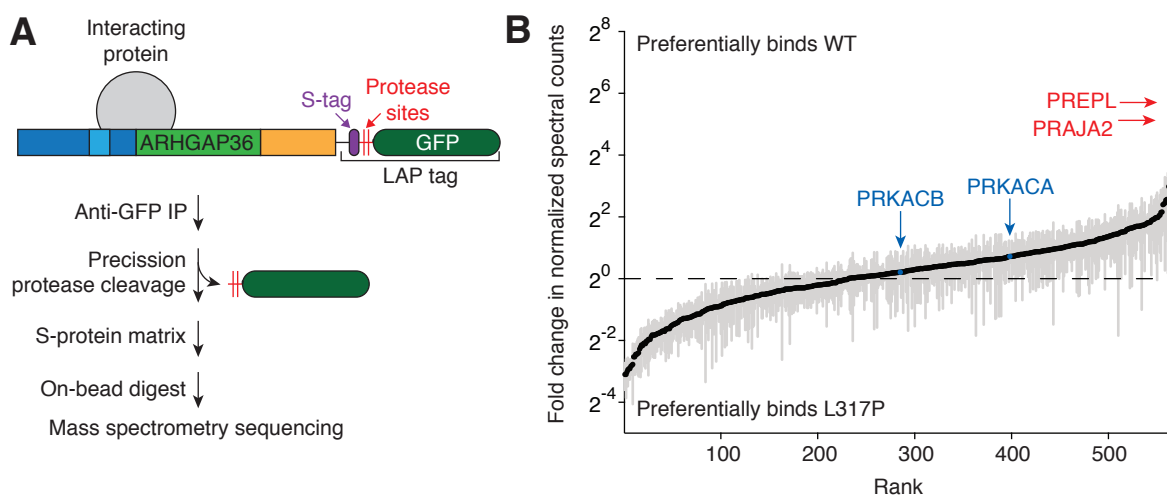

**Figure 6. PREPL and PRAJA2 interact with ARHGAP36 in a GAP-like domain-dependent manner.** (A) Schematic representation of the tandem affinity purification workflow for identifying ARHGAP36-binding proteins. (B) ARHGAP36 interactors ranked in order of their relative binding to the wild-type versus L317P proteins. Fold changes in normalized spectral counts represent the average values for three biological replicates  $\pm$  s.e.m., shown as grey bars.

317 ligase PRAJA2 exhibiting the greatest selectivity (52- and 35-fold, respectively). PREPL displays  
318 high sequence homology to a family of serine hydrolases, though its physiological substrates and  
319 functions remain largely unknown (*Jaeken, et al., 2006; Radhakrishnan, et al., 2013; Szeltner, et*  
320 *al., 2005*). PRAJA2 has been shown to increase PKA activity by promoting the ubiquitination and  
321 degradation of regulatory PKA (PKA<sub>reg</sub>) subunits, a function that is enhanced by PKA<sub>cat</sub>  
322 phosphorylation as part of a positive-feedback mechanism (*Lignitto, et al., 2011*).

323 Both PREPL and PRAJA2 have been classified as putative ARHGAP36-binding partners  
324 in large-scale interactome studies (*Huttlin, et al., 2017; Müller, et al., 2020*); however, their  
325 functional significance relative to the other candidates in those lists has been unclear. Our  
326 comparative interactome analyses therefore corroborate the results of these prior investigations  
327 and suggest that ARHGAP36-dependent Gli activation involves PREPL and PRAJA2 functions.

328

## 329 **DISCUSSION**

330 By systematically exploring the ARHGAP36 structure-activity landscape, we have  
331 identified key functional elements throughout this multidomain protein. Previous investigations  
332 identified an N-terminal arginine-rich region that is necessary and sufficient for PKA<sub>cat</sub> degradation  
333 (*Eccles, et al., 2016; Rack, et al., 2014*), establishing ARHGAP36 as a novel antagonist of PKA  
334 signaling. Isoform-specific differences have also implicated N-terminal sequences in ARHGAP36  
335 trafficking (*Rack, et al., 2014*). Our studies provide further evidence for these mechanisms of  
336 ARHGAP36 action, uncover a new functional module within the N-terminal domain, and  
337 demonstrate important regulatory roles for the GAP-like and C-terminal domains (Figure 7).

338 Among our key findings is the discovery of an N-terminal autoinhibitory region that is  
339 present in isoforms 1 and 2. In the context of isoform 2, this sequence (N2<sub>1-105</sub>) represses Gli1  
340 activation by the N-terminal domain and impedes its recruitment to the plasma membrane. N2<sub>1-105</sub>  
341 likely regulates these activities through distinct mechanisms, since the L86P mutation in this

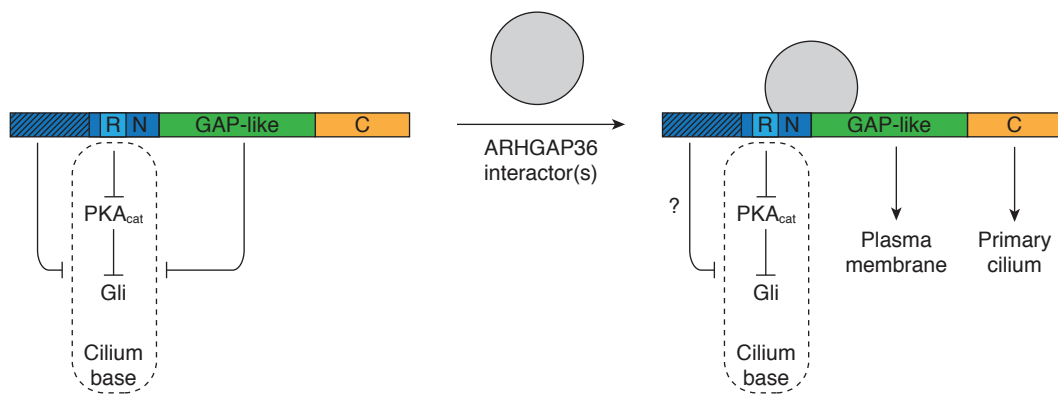

**Figure 7. A regulatory model for ARHGAP36 function.** Schematic representation of the structural elements that regulate ARHGAP36 localization and its ability to target Gli-regulating pools of PKA<sub>cat</sub> in the primary cilium. N-terminal regulatory regions that vary between ARHGAP36 isoforms are depicted with hash marks.

342 region diminishes the ability of isoform 2 to modulate PKA<sub>cat</sub>/Gli signaling without disrupting  
343 membrane localization. ARHGAP36 isoform 3, which lacks the region corresponding to N2<sub>1-105</sub>,  
344 not only traffics to the plasma membrane but also accumulates in the primary cilium. The ciliary  
345 localization of isoform 3 coincides with its ability to selectively degrade Golgi-localized PKA<sub>cat</sub>,  
346 likely due to vesicular transport between the cilium base and the Golgi (*Pedersen, et al., 2016*).  
347 Our results suggest that the Gli-regulating pool of PKA<sub>cat</sub> traffics through these organelles,  
348 corroborating previous reports that Hh signaling regulates PKA<sub>cat</sub> activity in the basal body (*Barzi,*  
349 *et al., 2009; Tuson, et al., 2011; Zhang, et al., 2019*). This mechanism of ARHGAP36-mediated  
350 Gli activation parallels the actions of other Hh pathway regulators that modulate ciliary PKA  
351 activity, such as adenylate cyclases 5 and 6 and the G-protein coupled receptor GPR161  
352 (*Chávez, et al., 2015; Garcia-Gonzalo, et al., 2015; Moore, et al., 2016; Mukhopadhyay, et al.,*  
353 *2013; Vuolo, et al., 2015*). ARHGAP36 might concurrently modulate Gli function via PKA-  
354 independent mechanisms, since forskolin can only inhibit ARHGAP36-induced Gli activity by  
355 50%, even when maximal compound doses and different levels of Gli activation are employed.

356         Although the ARHGAP36 N-terminal domain alone can target PKA<sub>cat</sub> for degradation and  
357 harbors regulatory elements, its function is further modulated by other structures in the full-length  
358 protein. The C-terminal domain strongly counteracts the autoinhibitory activity of N2<sub>1-105</sub>, as does  
359 the GAP-like region to a more moderate extent. These regulatory actions likely involve protein  
360 trafficking since the GAP-like and C-terminal domains promote ARHGAP36 recruitment to the  
361 plasma membrane and primary cilium, respectively. However, we cannot rule out the possibility  
362 that the two domains influence N2<sub>1-105</sub> function through additional mechanisms. Interestingly, the  
363 ability of point mutations in the GAP-like domain to abrogate Gli activation by isoforms 2 and 3  
364 contrasts the sufficiency of N2 and N3 for this process. The mutations also render these  
365 ARHGAP36 proteins cytosolic. These differences could be explained if the unbound GAP-like  
366 domain can repress the N-terminal region conserved between N2 and N3, which contains the

367 PKA<sub>cat</sub>-targeting arginine-rich motif and a plasma membrane-targeting sequence. Recruitment of  
368 specific cellular factors to the GAP-like domain could then modulate this interaction and possibly  
369 mediate other ARHGAP36 activities (see Figure 7).

370 Which interacting proteins might regulate or transduce ARHGAP36 function remains to be  
371 determined, but our investigations provide valuable leads. By comparing the interactomes of wild-  
372 type ARHGAP36 and an inactive mutant, we have identified several proteins that bind to  
373 ARHGAP36 in a GAP-like domain-dependent manner. Although previous studies have shown  
374 that ARHGAP36 can co-immunoprecipitate with PTCH1 (*Zhang, et al., 2019*) and SUFU (*Rack,*  
375 *et al., 2014*) when they are overexpressed in cells, we do not observe analogous interactions with  
376 the endogenous Hh signaling proteins. Rho GTPases were also notably absent from the  
377 ARHGAP36 pulldowns, suggesting that ARHGAP36 interacts transiently with these signaling  
378 proteins or prefers other binding partners. In contrast, PKA<sub>cat</sub> associated with both wild-type and  
379 L317P ARHGAP36 with comparable efficacies, indicating that the GAP-like domain mutation  
380 abrogates PKA<sub>cat</sub> degradation without compromising its binding. Among the ARHGAP36  
381 interactors discovered in our studies, PREPL and PRAJA2 emerged as the two most sensitive to  
382 the L317P mutation in the GAP-like domain. Both proteins were candidates in previous  
383 ARHGAP36 interactome datasets (*Huttlin, et al., 2017; Müller, et al., 2020*), but the functional  
384 relevance of these factors and other ARHGAP36-binding proteins has yet to be determined. By  
385 comparing the wild-type and mutant ARHGAP36 interactomes, we can provide a functional  
386 context for these binding proteins, implicating PREPL and PRAJA2 in ARHGAP36-dependent Gli  
387 activation.

388 In principle, the GAP-like domain could bind directly to PREPL or PRAJA2, or it could  
389 allosterically regulate their interactions with other regions in the ARHGAP36 protein. PREPL is  
390 highly homologous to the prolyl oligopeptidase (PREP) family of serine hydrolases, but its  
391 hydrolytic targets remain uncharacterized (*Jaeken, et al., 2006; Szeltner, et al., 2005*). Putative

392 peptidic substrates could include factors that regulate PKA<sub>cat</sub> or Gli activity. Alternatively, there is  
393 evidence that PREP enzymes can modulate the metabolism of phosphoinositides (*Schulz, et al.,*  
394 *2002; Williams, et al., 1999*), a family of lipids with reported roles in the formation of Golgi-derived  
395 vesicles (*Heldwein, et al., 2004; Wang, Ying Jie, et al., 2003*) and the ciliary trafficking of Hh  
396 pathway regulators (*Chávez, et al., 2015; Garcia-Gonzalo, et al., 2015*). The interaction of  
397 ARHGAP36 with PRAJA2 is seemingly paradoxical since PRAJA2 has well-established roles in  
398 promoting PKA<sub>reg</sub> degradation and PKA<sub>cat</sub> activation (*Lignitto, et al., 2013; Lignitto, et al., 2011;*  
399 *Sepe, et al., 2014*). However, one possibility is that PRAJA2-mediated PKA<sub>reg</sub> degradation leads  
400 to the mislocalization of Gli-regulating pools of PKA<sub>cat</sub>. We note that neither PREPL nor PRAJA2  
401 were identified as hits in CRISPR knockout screens for Hh pathway regulators (*Breslow, et al.,*  
402 *2018; Pusapati, et al., 2018*), suggesting that they participate in an ARHGAP36-specific pathway  
403 for Gli activation. Determining how these factors contribute to ARHGAP36 action could uncover  
404 novel aspects of Gli regulation.

405       Taken together, our findings provide new insights into the mechanisms that underlie non-  
406 canonical Gli activation by ARHGAP36, and they provide a general framework for understanding  
407 ARHGAP36 function. In particular, our studies reveal how ARHGAP36 can translate multiple  
408 cellular inputs into distinct signaling outputs. By controlling the expression of ARHGAP36 isoforms  
409 and/or ARHGAP36-interacting proteins, cells can direct this signaling protein to specific PKA<sub>cat</sub>  
410 populations and elicit tissue-specific responses. We anticipate that these mechanisms not only  
411 contribute to Gli-dependent spinal cord development and medulloblastoma progression but also  
412 other PKA<sub>cat</sub>-dependent processes in normal physiology and disease. Moreover, the experimental  
413 methods utilized for our study could be redeployed to elucidate these unique ARHGAP36  
414 functions.

415

## 416 **METHODS**

### 417 *Reagents and cell lines*

418           Antibody sources and working dilutions are listed in Supplementary File 3. Forskolin was  
419 purchased from Calbiochem, and SAG was purchased from Tocris. SHH-LIGHT2 (*Taipale, J, et*  
420 *al., 2000*) and SHH-EGFP cells (*Hyman, et al., 2009*) were described previously, and NIH-3T3  
421 and HEK-293T cells were purchased from the American Type Culture Collection.

422

### 423 *Expression vectors*

424           The pDONR223 vector was provided by J. Hartley and D. Esposito. The following  
425 constructs have been described previously (*Rack, et al., 2014; Wright, et al., 2011*): Gateway  
426 cloning destination vectors pBMN-3xFLAG-IRES-mCherry-DEST, pBMN-mCherry-DEST, and  
427 pG-LAP7-DEST, Gateway cloning entry vectors pDONR223-ARHGAP36 (isoforms 1 - 5), and  
428 expression vectors pcDNA3.2-ARHGAP36 (isoform 2)-V5, pBMN-3xFLAG-IRES-mCherry, and  
429 pBMN-mCherry. pCL-ECO retrovirus packaging vector was purchased from Imegenex.

430           Retroviral expression vectors for FLAG-tagged ARHGAP36 isoforms 1 - 5 were produced  
431 by transferring cDNAs from the appropriate pDONR223 entry vectors into pBMN-3xFLAG-IRES-  
432 mCherry-DEST in an LR Clonase II (Invitrogen, Waltham, MA)-mediated recombination reaction.  
433 Retroviral expression vectors for mCherry-tagged ARHGAP36 isoforms 1 and 2 were produced  
434 in an analogous manner with pBMN-mCherry-DEST. Restriction sites were then inserted  
435 upstream (XhoI) and downstream (SacII) of the *ARHGAP36* sequence in the initial pBMN-  
436 ARHGAP36 (isoform 1)-mCherry and pBMN-ARHGAP36 (isoform 2)-mCherry products. This was  
437 achieved by first amplifying *ARHGAP36* cDNA from the pBMN-derived vectors (Supplementary  
438 File 3; primers 1 - 3) and then inserting the resulting PCR product into BamHI-digested pBMN-  
439 mCherry using Gibson assembly (New England Biolabs, Ipswich, MA). The resulting pBMN-



440 ARHGAP36-mCherry vectors with XhoI and SacII restriction sites were subsequently used in all  
441 experiments described herein.

442 Retroviral expression vectors for ARHGAP36 isoform 2 truncation mutants were  
443 generated by amplifying the cDNA for each variant from pcDNA3.2-ARHGAP36 (isoform 2)-V5,  
444 using primers containing attB adapter sequences (Supplementary File 3; primers 4-8). The PCR  
445 products were transferred into pDONR223 in a BP Clonase II (Invitrogen)-mediated  
446 recombination reaction, and the *ARHGAP36*-derived cDNAs in these pDONR223 entry vectors  
447 were then transferred to pBMN-3xFLAG-IRES-mCherry-DEST using LR Clonase II. The resulting  
448 constructs were also used as templates to amplify cDNAs for the analogous FLAG-tagged  
449 ARHGAP36 isoform 3 truncation mutants and the downstream IRES-mCherry sequence  
450 (Supplementary File 3; primers 9 and 10). These PCR products were then inserted into XcmI-  
451 digested pBMN-ARHGAP36 (isoform 2)-3xFLAG-IRES-mCherry using Gibson assembly.

452 Individual ARHGAP36 isoform 2 point mutants, with the exception of L171P, were  
453 generated using site-directed mutagenesis with PfuUltra II Fusion polymerase (Agilent, Santa  
454 Clara, CA) (Supplementary File 3; primers 11-42) and either pBMN-ARHGAP36 (isoform 2)-  
455 3xFLAG-IRES-mCherry or the pBMN-ARHGAP36 (isoform 2)-mCherry as template. ARHGAP36  
456 isoform 2 L171P mutant constructs were generated by Gibson assembly using a XhoI- and SacII-  
457 digested pBMN-ARHGAP36 (isoform 2)-mCherry plasmid, inserts amplified from pBMN-  
458 ARHGAP36 (isoform 2)-mCherry (Supplementary File 3; primers 3 and 43-45), and a double-  
459 stranded oligonucleotide encoding the L171P mutation (Integrated DNA Technologies, Coralville,  
460 IA) (Supplementary File 3; entry 46) .

461 Retroviral expression vectors for mCherry-tagged wild-type, C107Y, and L212P  
462 ARHGAP36 isoform 3 were generated by amplifying the cDNAs encoding this isoform from the  
463 corresponding mutant pBMN-ARHGAP36 (isoform 2)-mCherry plasmids (Supplementary File 3;  
464 primers 3 and 47) and amplifying the mCherry tag from pBMN-ARHGAP36 (isoform2)-mCherry

465 plasmid (Supplementary File 3; primers 10 and 48). The resulting amplicons were inserted into  
466 XcmI-digested pBMN-ARHGAP36 (isoform 2)-3xFLAG-IRES-mCherry using Gibson assembly.  
467 Retroviral expression vectors for mCherry-tagged wild-type, C212Y, and L317P ARHGAP36 N2-  
468 GAP were generated by amplifying the cDNAs encoding ARHGAP36 N2-GAP from the  
469 corresponding mutant pBMN-ARHGAP36 (isoform 2)-mCherry plasmids (Supplementary File 3;  
470 primers 45 and 49) and inserting into XhoI- and SacII-digested pBMN-ARHGAP36 (isoform 2)-  
471 mCherry using Gibson assembly.

472 To generate retroviral expression vectors for LAP-tagged ARHGAP36 constructs,  
473 *ARHGAP36* cDNA in the pDONR223-ARHGAP36 (isoform 2) entry vector was transferred to pG-  
474 LAP7-DEST using LR Clonase II. The cDNA encoding LAP-tagged ARHGAP36 was amplified  
475 from the resulting pG-ARHGAP36 (isoform 2)-LAP7 plasmid (Supplementary File 3; primers 10  
476 and 50) and inserted into XcmI-digested pBMN-ARHGAP36 (isoform 2)-3xFLAG-IRES-mCherry  
477 using Gibson assembly. LAP-tagged L317P ARHGAP36 isoform 2 retroviral expression  
478 constructs were generated using an analogous Gibson assembly with *ARHGAP36* cDNA  
479 amplified from pBMN-ARHGAP36 (isoform 2 L317P)-3xFLAG-IRES-mCherry (Supplementary  
480 File 3; primers 50 and 51) and LAP tag cDNA amplified from pG-ARHGAP36 (isoform 2)-LAP7  
481 (Supplementary File 3; primers 10 and 48).

482 With the exception of the constructs generated by site-directed mutagenesis described  
483 above, all PCR products were generated with Phusion polymerase (New England Biolabs). All  
484 plasmids were sequence-verified.

485

#### 486 *Retrovirus production*

487 HEK-293T cells were seeded into individual wells of a 6-well plate at a density of  
488  $1.0 \times 10^6$  cells/well. The cells were cultured for 24 hours in HEK-293T growth medium (DMEM  
489 containing 10% fetal bovine serum, 2 mM L-glutamine, 1 mM sodium pyruvate, 100 U/mL

490 penicillin, and 0.1 mg/mL streptomycin) and then transfected as follows. pBMN vectors containing  
491 the appropriate ARHGAP36 construct (1.33  $\mu$ g) and the pCL-ECO retrovirus packaging vector  
492 (0.67  $\mu$ g) were diluted in OMEM medium (75  $\mu$ L), and the solution was added to OMEM (75  $\mu$ L)  
493 containing 6  $\mu$ L Fugene HD reagent (Promega, Madison, WI). The mixture was incubated at room  
494 temperature for 10 minutes and gently added to the growth medium on the cultured cells. After  
495 24 hours, the medium was replaced with DMEM containing 1.8 mM L-glutamine, 4% fetal bovine  
496 serum, 6% calf serum, 1 mM sodium pyruvate, 100 U/mL penicillin, and 0.1 mg/mL streptomycin.  
497 Retrovirus-containing supernatant was then collected two times at 20-hour intervals, passed  
498 through a 0.45- $\mu$ m filter, and stored at  $-80$  °C. Large-scale retrovirus production was conducted  
499 using HEK-293T cells seeded on 10-cm plates at a density of  $5.0 \times 10^6$  cells/well transfected with  
500 6.48  $\mu$ g of the ARHGAP36 construct, 4  $\mu$ g of pCL-ECO, and 35  $\mu$ L of Fugene HD in 750  $\mu$ L  
501 OMEM medium.

502

### 503 *Generation of ARHGAP36-expressing NIH-3T3 cell lines*

504 NIH-3T3 cells were seeded into individual wells of 24-well or 6-well plates at a density of  
505  $7.5 \times 10^4$  or  $2.0 \times 10^5$  cells/well, respectively. The cells were cultured for 24 hours in NIH-3T3  
506 growth medium (DMEM containing 10% calf serum, 1 mM sodium pyruvate, 100 U/mL penicillin,  
507 and 0.1 mg/mL streptomycin) and then transduced with 4  $\mu$ g/mL polybrene and retrovirus for the  
508 appropriate ARHGAP36-3xFLAG-IRES-mCherry construct to achieve a multiplicity of infection  
509 (MOI)  $< 0.5$ . After 24 hours, the medium was exchanged, and the cells were expanded for  
510 fluorescence-activated cell sorting (FACS).

511 For FACS, the cells were washed with PBS buffer, dissociated with TrypLE (Invitrogen)  
512 for 3-5 minutes at 37 °C, and centrifuged at 106  $g$  for 5 minutes at 4 °C. Cell pellets were then  
513 resuspended in FACS buffer (PBS containing 1% calf serum), passed through a 70- $\mu$ m cell  
514 strainer (BD Biosciences, San Jose, CA), and added to round-bottom FACS tubes. Cell

515 populations with comparable mCherry fluorescence intensities were then obtained using a BD  
516 FACS Aria II (532-nm laser and 600-nm longpass filter, or 561-nm laser and 610/20-nm bandpass  
517 filter) or BD Influx (561-nm laser and 610/20-nm bandpass filter) sorter.

518

519 *Quantitative reverse transcription-PCR (qRT-PCR) analyses*

520 NIH-3T3 cell lines expressing the indicated FLAG-tagged ARHGAP36 constructs were  
521 seeded into 6-well plates at a density of  $5.2 \times 10^5$  cells/well and cultured in NIH-3T3 growth  
522 medium. An uninfected condition was also prepared as a negative control. After two days, fully  
523 confluent cells were treated with NIH-3T3 low-serum medium (DMEM containing 0.5% calf serum,  
524 sodium pyruvate and antibiotics) with or without 10% SHH-N-conditioned medium for 30 hours.  
525 The media was replaced with ice-cold PBS, and the cells were collected by manual scraping.  
526 Each resulting cell suspension was divided into two tubes (one each for qRT-PCR and Western  
527 blot analyses) and centrifuged at 750 *g* for 7 minutes at 4 °C.

528 Cell pellets were prepared for qRT-PCR analyses as follows. RNA was isolated using the  
529 Monarch Total RNA miniprep kit (New England BioLabs), and equivalent amounts of RNA were  
530 used to synthesize cDNA using the SuperScript III First-Strand Synthesis System (Invitrogen).  
531 qRT-PCR was performed on a Lightcycler 480 II (Roche, Penzberg, Germany) using the following  
532 TaqMan probes: Gli1-Mm00494645\_m1, Beta-2-Microglobulin-Mm00437762\_m1 (Applied  
533 Biosystems, Waltham, MA). Gene expression levels were normalized to  $\beta$ -2-microglobulin. For  
534 ARHGAP36 isoform and truncation mutant analyses, the normalized gene expression levels were  
535 compared to that of uninfected cells, and for point mutant analyses, compared to that of wild-type  
536 ARHGAP36. The resulting gene expression levels were averaged across three biological  
537 replicates, and *P* values were determined using either a Student's one-tailed t-test (ARHGAP36  
538 isoform and truncation mutant analyses) or two-tailed t-test (point mutant analyses).

539

540 *Western blot analyses*

541 Cell pellets were resuspended in 1x Laemmli sample buffer (10% glycerol, 2% SDS,  
542 17 mM DTT, 0.01% bromophenol blue, 60 mM Tris-HCl, pH 6.8, and protease and phosphatase  
543 inhibitors (Roche)). After incubation for 20 minutes at 4 °C, cell lysates were boiled for 10 minutes  
544 and sonicated in a water bath for 15 seconds. Equivalent amounts of total protein per lysate were  
545 loaded onto Criterion XT 4-12% Bis-Tris polyacrylamide gels (Bio-Rad, Hercules, CA), transferred  
546 onto PVDF membranes (Bio-Rad), and detected using the antibodies listed in Supplementary  
547 File 3 with either SuperSignal West Dura or SuperSignal Femto kits (Pierce, Waltham, MA) and a  
548 ChemiDoc XRS imaging system (Bio-Rad). Band intensities were quantified using ImageLab  
549 software (Bio-Rad) and normalized to KPNB1 band intensities in the corresponding sample. For  
550 each replicate, the normalized band intensity in each condition was normalized to that of  
551 uninfected cells. The resulting relative band intensities for each condition was averaged across  
552 three biological replicates, and *P* values were determined using a Student's two-tailed t-test.

553

554 *Immunofluorescence studies*

555 The subcellular localizations of FLAG-tagged ARHGAP36 constructs were assessed as  
556 follows. NIH-3T3 cells were seeded onto individual wells of a 6-well plate at a density of  
557  $2.0 \times 10^5$  cells/well. Cells were cultured for 24 hours in NIH-3T3 growth medium, then transduced  
558 with 4 µg/mL polybrene and retrovirus for the appropriate ARHGAP36-3xFLAG-IRES-mCherry  
559 construct to achieve an MOI < 0.5. After 24 hours, cells were re-seeded at a 1:8 dilution into 24-  
560 well plates containing poly-D-lysine-coated 12-mm glass coverslips and cultured for 1-2 days in  
561 growth medium. Cells were fixed in PBS containing 4% paraformaldehyde for 10 minutes at room  
562 temperature and washed 3 times with PBS. Cells were next permeabilized with PBS containing  
563 0.5% Triton X-100 for 5 minutes, washed 2 times with PBS, and incubated in blocking buffer (PBS  
564 containing 1% BSA and 0.1% Triton X-100) for 1 hour at room temperature. The cells were then

565 incubated for 1 hour at room temperature with primary antibodies diluted in blocking buffer,  
566 washed 4 × 5 minutes with PBS containing 0.1% Triton X-100, incubated for 1 hour with the  
567 appropriate secondary antibodies diluted in PBS containing 0.2% Triton X-100, and washed 4 ×  
568 5 minutes with PBS. The coverslips were rinsed briefly in water and mounted onto slides using  
569 Prolong Gold Antifade reagent with DAPI (Invitrogen).

570 The subcellular localizations of mCherry-tagged ARHGAP36 isoform 3 and N2-GAP  
571 constructs were assessed as follows. SHH-EGFP cells were seeded into individual wells of a 24-  
572 well plate at a density of  $7.5 \times 10^4$  cells/well. The cells were cultured for 24 hours in SHH-EGFP  
573 growth medium (NIH-3T3 growth medium containing 150 µg/mL zeocin) for 24 hours and then  
574 transduced with 4 µg/mL polybrene and retrovirus for the appropriate ARHGAP36-mCherry  
575 construct to achieve an MOI < 0.5. After 24 hours, the cells were passaged into a new 24-well  
576 plate at a 1:1.5 dilution and cultured in growth medium for an additional 2 days to achieve 100%  
577 confluency. Confluent cells were then treated for 24 hours with SHH-EGFP low-serum medium  
578 (DMEM containing 0.5% calf serum, sodium pyruvate, zeocin, and antibiotics). Cells were next  
579 passaged at a 1:3 dilution into 24-well plates containing poly-D-lysine-coated 12-mm glass  
580 coverslips and cultured for 1 day in growth medium. Cells were then fixed, blocked,  
581 immunostained, and mounted as described above. The subcellular localizations of mCherry-  
582 tagged isoform 2 constructs were similarly assessed, with the exception that the cells were  
583 passaged onto coverslip-containing 24-well plates 24 hours after retroviral transduction then  
584 cultured for two days prior to being fixed.

585 The effects of ARHGAP36 isoforms on PKA<sub>cat</sub> localization were assessed as follows. NIH-  
586 3T3 cell lines stably expressing FLAG-tagged ARHGAP36 isoforms 2 or 3 were seeded into 24-  
587 well plates containing poly-D-lysine-coated 12-mm glass coverslips at a density of  $1.2 \times 10^5$   
588 cells/well. Cells were then cultured in NIH-3T3 growth medium for 2 days, at which time the cells  
589 were fixed in PBS containing 2% paraformaldehyde for 20 minutes at room temperature and then

590 treated with methanol for 5 minutes at  $-20^{\circ}\text{C}$ . The fixed cells were incubated in blocking buffer  
591 for 1 hour at room temperature and incubated with primary antibodies diluted in blocking buffer  
592 overnight at  $4^{\circ}\text{C}$ . Subsequent PBS washes, secondary antibody incubation, and mounting were  
593 conducted as described above.

594 Fluorescence images were obtained using either a Zeiss LSM 700 or 800 confocal  
595 microscope equipped with a 63x oil-immersion objective. Maximum-intensity Z-stack projections  
596 were created using either ZEN Black (Zeiss, Oberkochen, Germany), ZEN Blue (Zeiss), or FIJI  
597 (*Schindelin, et al., 2012*) software, fluorescence intensities were adjusted using FIJI, and images  
598 were cropped using Photoshop CC (Adobe, San Jose, CA).

599

#### 600 *Luciferase assays*

601 SHH-LIGHT2 cells were seeded into 10-cm plates at a density of  $1.0 \times 10^6$  cells/plate and  
602 cultured in SHH-LIGHT2 growth medium (NIH-3T3 growth medium containing  $150 \mu\text{g/mL}$  zeocin  
603 and  $500 \mu\text{g/mL}$  G418). After 24 hours of growth, cells were transduced with  $4 \mu\text{g/mL}$  polybrene  
604 and retrovirus for either the appropriate ARHGAP36-3xFLAG-IRES-mCherry construct or for a  
605 3xFLAG-IRES-mCherry construct for another 24 hours. The cells were then re-seeded into  
606 individual wells of a 96-well plate at a density of  $3.5 \times 10^4$  cells/well. All cells were cultured for an  
607 additional 24 hours, at which time the fully confluent cells were treated for 30 hours with varying  
608 conditions of forskolin in SHH-LIGHT2 low-serum medium (DMEM containing 0.5% calf serum,  
609 1% sodium pyruvate, zeocin, G418, and antibiotics) with or without 10% SHH-N-conditioned  
610 medium. The cells were then lysed and luciferase activities were measured using a Dual-  
611 Luciferase Reporter Assay System (Promega) on a Veritas luminometer (Turner BioSystems,  
612 Sunnyvale, CA). At least three biological replicates were conducted for each condition.

613

614



615 *Mutant library generation*

616 A library encoding ARHGAP36 isoform 2 mutants was created via error-prone PCR  
617 (epPCR) using the GeneMorph II Random Mutagenesis Kit (Agilent). To determine the optimal  
618 epPCR conditions for library generation, the mutation frequency was estimated for epPCRs  
619 consisting of 15, 20, 25, or 29 cycles. All reactions were conducted according to the  
620 manufacturer's instructions, using 1.64 µg of the pBMN-ARHGAP36 (isoform2)-mCherry plasmid  
621 as template, 0.4 µM of each primer (Supplementary File 3; primers 45 and 52), and 4% DMSO.  
622 The product yield for each condition was estimated by resolving 10% of the reaction on a 1%  
623 EtBr-agarose gel and quantifying the band intensity of the resulting amplicon with ImageLab  
624 software (Bio-Rad). The 1.6-kb amplicon was gel-extracted using the QiaQuick Gel Extraction Kit  
625 (Qiagen, Hilden, Germany) and ligated into a XhoI- and SacII-digested pBMN-ARHGAP36  
626 (isoform 2)-mCherry vector using Gibson assembly. To estimate the mutation frequency for each  
627 epPCR-generated library, XL-10 Gold *E. coli* (Agilent) were chemically transformed with 1:4  
628 diluted Gibson assembly products and plated onto ampicillin-agarose plates. Forty colonies from  
629 each plate were sequenced using rolling circle amplification and Sanger sequencing (Sequetech,  
630 Mountain View, CA) (Supplementary File 3; primers 53-58). High-quality *ARHGAP36* reads were  
631 aligned to the coding sequence for wild-type ARHGAP36 isoform 2, and the number of nucleotide  
632 mutations within the coding sequence was counted for each read. This analysis yielded the  
633 distribution of mutated nucleotides across the library.

634 Through these pilot studies, we found that the 15-cycle epPCR conditions maximized the  
635 percentage of *ARHGAP36* variants with single-nucleotide changes. We next generated a large-  
636 scale library using the 15-cycle epPCR and Gibson assembly strategy described above. The  
637 undiluted Gibson reaction (8 µL) was electroporated into 160 µL of MegaX DH10B T1<sup>R</sup>  
638 Electrocomp cells (Invitrogen). The electroporated cells were immediately transferred to 480 mL  
639 of Superior Broth containing 75 µg/mL ampicillin, and 100 µL of the culture was plated on



640 ampicillin-agar plates to estimate the number of colony-forming units. The final library was found  
641 to contain approximately  $4 \times 10^5$  colony-forming units, which corresponds to an equivalent number  
642 of library elements. The liquid culture was incubated at 30 °C until it reached an OD<sub>600</sub> of 1, after  
643 which plasmids were isolated using the NucleoBond Xtra Midi Plus Kit (Macherey-Nagel, Düren,  
644 Germany).

645 Retroviral medium harboring the ARHGAP36 mutant library was generated in the following  
646 manner. One 10-cm plate of HEK-293T cells at 90% confluency was transfected with 6.5 µg of  
647 the pBMN-ARHGAP36 (isoform 2)-mCherry mutant library and 4 µg of pCL-ECO using the  
648 FuGene HD transfection reagent (Promega). The medium was replaced after 24 hours with  
649 DMEM containing 1.8 mM L-glutamine, 4% fetal bovine serum, 6% calf serum, 1% sodium  
650 pyruvate, 100 U/mL penicillin, and 0.1 mg/mL streptomycin. Retrovirus-containing supernatant  
651 was then collected two times at 24-hour intervals, passed through a 0.45-µm filter, and stored at  
652 -80 °C.

653

#### 654 *FACS-based screening*

655 SHH-EGFP cells were seeded onto a 15-cm plate at a density of  $1.0 \times 10^6$  cells/plate and  
656 cultured in SHH-EGFP growth medium for 2 days, then transduced with the retroviral library of  
657 ARHGAP36 mutants and 4 µg/mL polybrene to achieve an MOI < 0.5. After 24 hours, the cells  
658 were expanded to 4 x 15-cm plates and cultured for an additional 2 days. SHH-EGFP cells treated  
659 with 10% SHH-N-conditioned media or transduced with retrovirus encoding wild-type ARHGAP36  
660 isoform 2 served as positive controls for flow cytometry. For negative controls, untreated SHH-  
661 EGFP cells or cells transduced with retrovirus encoding ARHGAP36 isoform 1 were used.

662 To isolate mCherry+ cells by FACS, the transduced SHH-EGFP cells were washed with  
663 PBS, dissociated with TrypLE for 3-5 minutes at 37° C, and centrifuged at 750 g for 7 minutes at  
664 4 °C. The resulting cell pellets were resuspended in FACS buffer (PBS containing 1% calf serum),

665 passed through a 70- $\mu$ m cell strainer, and added to round-bottom FACS tubes. Cell sorting was  
666 performed on a BD FACSAria II configured with a 561-nm laser, a 595-nm longpass filter, and a  
667 616/23-nm bandpass filter for mCherry detection. Data was collected with FACSDiva software  
668 (BD Biosciences) and analyzed using FlowJo (FlowJo, Ashland, Oregon).  $2.7 \times 10^7$  cells were  
669 analyzed by FACS analysis.

670 This first sort produced a population of  $3 \times 10^6$  mCherry+ cells, which were cultured for  
671 3 days until they reached 100% confluency. The cells were then cultured in SHH-EGFP low-  
672 serum medium to enable ARHGAP36-mediated Gli activation. After 24 hours, cells were  
673 expanded at a 1:2 dilution, cultured for 24 hours to achieve full confluency, and serum-starved  
674 again for another 24 hours.

675 To isolate cells expressing inactive forms of ARHGAP36 isoform 2 (mCherry+/EGFP-),  
676  $1.1 \times 10^7$  cells from the expanded mCherry+ population were washed and dissociated as  
677 described above. Approximately  $3 \times 10^6$  cells were separated and expanded to  $4 \times 10^7$  cells to  
678 establish a pre-selection population, which was then washed with PBS, dissociated, and pelleted  
679 by centrifugation at 750 *g* for 7 minutes at 4 °C. The pellet was stored at -80 °C until used for  
680 genomic DNA extraction. The remaining  $8 \times 10^6$  mCherry+ cells were analyzed by FACS to select  
681 for those expressing inactive ARHGAP36-mCherry mutants. Cells were sorted as described  
682 above using the BD FACSAria II configured with a 488-nm dye laser, a 495-nm longpass filter,  
683 and a 530/30-nm bandpass filter for EGFP detection and the laser/filter configurations described  
684 above for mCherry detection. Approximately  $4 \times 10^5$  mCherry+/EGFP- cells were obtained from  
685 this second sort, and they were cultured for 2 days to reach full confluency and then subjected to  
686 2 rounds of serum starvation. FACS sorting of this enriched population yielded  $1.6 \times 10^5$   
687 mCherry+/EGFP- cells, which were expanded, frozen in SHH-EGFP growth medium containing  
688 10% DMSO, and stored in liquid nitrogen.

689 We then assessed if the mCherry+/EGFP– cells were still capable of Gli-dependent EGFP  
690 expression under canonical Hh pathway activation conditions. Frozen aliquots of cells from the  
691 third sort were thawed, expanded, and subjected to two rounds of serum starvation.  
692 Approximately  $1.0 \times 10^7$  cells were sorted with a BD FACSAria IIu configured with a 488-nm laser,  
693 a 502-nm longpass filter, and a 525/50-nm bandpass filter for EGFP detection and a 488-nm  
694 laser, a 595-nm longpass filter, and a 610/20-nm bandpass filter for mCherry detection.  $1.0 \times 10^6$   
695 mCherry+/EGFP– cells were collected and cultured for 7 days to achieve full confluency. The  
696 cells were then treated with 200 nM SAG in SHH-EGFP low-serum medium for 24 hours,  
697 expanded at a 1:2 dilution, cultured for 24 hours to enable full confluency, and treated again with  
698 200 nM SAG for 24 hours.  $2 \times 10^7$  cells were then sorted with the BD FACSAria IIu to obtain  $3 \times$   
699  $10^6$  mCherry+/EGFP+ cells. This selected population was expanded to  $5 \times 10^6$  cells, which were  
700 then washed with PBS, dissociated, and pelleted by centrifugation at 750 *g* for 7 minutes at 4 °C.  
701 The pellet was stored at –80 °C until used for genomic DNA extraction.

702

### 703 *Deep-sequencing analyses of pre- and post-selection pools*

704 Genomic DNA was extracted from frozen pellets using the QIAamp DNA Blood Maxi Kit  
705 (Qiagen) according to manufacturer's instructions. For each sample, *ARHGAP36* inserts were  
706 isolated from genomic DNA by PCR using 500 ng of genomic DNA, 0.5 μM each of primer (Tables  
707 S3, primers 59 and 60), 0.2 μM dNTP mix, and Phusion High-Fidelity DNA Polymerase in HF  
708 buffer (New England BioLabs). A total of 182 PCRs were used to isolate *ARHGAP36* inserts from  
709 91 μg of pre-selection genomic DNA, while 89 PCRs were used to isolate inserts from 45 μg of  
710 post-selection genomic DNA. For each condition, the respective reactions were pooled, purified  
711 using the QIAquick PCR Purification Kit (Qiagen), and resolved on a 0.8% EtBr–agarose gel. The  
712 1.6-kb amplicon was then gel-extracted using the QIAquick Gel Extraction Kit. Amplicons were  
713 quantified using a Bioanalyzer 2100 with high-sensitivity DNA kits (Agilent), sheared into 150-bp

714 fragments with an S220 focused-ultrasonicator (Covaris, Woburn, MA), and sequenced on a  
715 NextSeq 500 Sequencer using High-Output v2 kits (Illumina, San Diego, CA). Raw data have  
716 been deposited into the Dryad Digital Repository with the dataset identifier  
717 10.5061/dryad.dz08kprv9.

718 FASTQ files were aligned to the wild-type *ARHGAP36* coding sequence (Bowtie2 v2.3  
719 (Langmead, *et al.*, 2012) and sorted by read name (SAMtools v1.3.1) (Li, Heng, *et al.*, 2009). The  
720 resulting mapped and sorted reads were then analyzed with an in-house Python script  
721 (Supplementary File 4). Briefly, high-quality reads were aligned to the wild-type *ARHGAP36*  
722 coding sequence. Reads with greater than 3 high-quality mutations or with internal stop codons  
723 were discarded from further analysis. The remaining reads were translated, identifying the  
724 *ARHGAP36* amino acid mutations present in the population. For each residue, the fold-change in  
725 its mutation frequency between the pre- and post-selection populations was calculated.

726

#### 727 *Flow cytometry-based assays*

728 SHH-EGFP cells were seeded into individual wells of a 24-well plate at a density of  
729  $7.5 \times 10^4$  cells/well and cultured for 24 hours in SHH-EGFP growth medium. The cells were then  
730 transduced with retrovirus for the appropriate *ARHGAP36*-mCherry construct and 4  $\mu\text{g}/\text{mL}$   
731 polybrene to achieve an MOI < 0.5. An uninfected condition was also prepared as a negative  
732 control. After 24 hours, the cells were passaged onto a new 24-well well at a 1:1.5 dilution and  
733 cultured in growth medium for an additional 2 days to achieve 100% confluency. Confluent cells  
734 were then treated with SHH-EGFP low-serum medium for 24 hours. Cells were then passaged at  
735 a 1:1.5 dilution onto a new 24-well well and cultured for 24 hours to achieve full confluency for a  
736 second round of 24-hour serum-starvation with or without SHH-N-conditioned medium.

737 For flow cytometry analyses, the cells were washed with PBS, dissociated with TrypLE for  
738 3-5 minutes at 37 °C, and centrifuged 750 *g* for 7 minutes at 4 °C. Cell pellets were resuspended

739 in FACS buffer (PBS containing 1% calf serum) and analyzed on a DXP FACScan (561-nm laser  
740 and 616/25-nm bandpass filter for mCherry detection; 488-nm laser, 560-nm shortpass filter, and  
741 525/50-nm bandpass filter for EGFP detection) or a BD LSRII (561-nm laser, 600-nm longpass  
742 band filter, and a 610/20-nm bandpass filter for mCherry detection; 488-nm laser, 505-nm  
743 longpass band filter, and 525/50-nm bandpass filter for EGFP detection). Data was collected with  
744 Cypod (Cytex, Fremont, CA) and FACSDiva software and analyzed using FlowJo. Fluorescence  
745 data was collected for at least  $2.5 \times 10^4$  cells, and three biological replicates were analyzed for  
746 each condition.

747 Data analyses for all conditions except for the uninfected controls excluded mCherry–  
748 cells, which is indicative of a lack of ARHGAP36 expression, and the median EGFP fluorescence  
749 was calculated to measure Gli activity in each condition. For each replicate, the median EGFP  
750 fluorescence was normalized to that of wild-type ARHGAP36-expressing cells, and a Student's  
751 one-tailed t-test was used to identify mutations that significantly altered median EGFP  
752 fluorescence levels ( $P \leq 0.05$ ).

753

#### 754 *Tandem affinity purification and quantitative proteomics*

755 NIH-3T3 cells were seeded onto 15-cm plates (6 per condition) at a density of  $2 \times 10^6$   
756 cells/plate and cultured in NIH-3T3 growth medium. After 24 hours, cells were transduced with  
757 retrovirus for either wild-type or L317P ARHGAP36 with a C-terminal LAP tag and 4  $\mu\text{g}/\text{mL}$   
758 polybrene to achieve an MOI  $> 1.5$ . The media was exchanged for growth medium after 4 hours,  
759 and cells were cultured for an additional 20 hours. Cells were then washed with cold PBS,  
760 manually scraped off each dish, and transferred into Falcon tubes. Cell suspensions expressing  
761 the same ARHGAP36 construct were combined, and 0.5% of the resulting pool was reserved for  
762 downstream flow cytometry analyses to confirm the MOI. The remaining cells were centrifuged at  
763 750  $g$  for 7 minutes at 4 °C. The supernatant was aspirated, and the remaining cell pellet was

764 flash frozen in liquid nitrogen and stored at  $-80^{\circ}\text{C}$  prior to LAP-tagged mediated tandem affinity  
765 purification. Three biological replicates were conducted for each wild-type and L317P  
766 ARHGAP36-LAP comparison.

767 Tandem affinity purifications and mass spectrometry analyses were conducted as  
768 described previously (*Ding, et al., 2016; Hsu, et al., 2019; Kanie, et al., 2017; Li, Bin, et al., 2017;*  
769 *Torres, et al., 2009; Wright, et al., 2011*). Pellets of ARHGAP36-LAP-expressing cells were re-  
770 suspended in LAP resuspension buffer (300 mM KCl, 50 mM HEPES-KOH (pH 7.4), 1 mM EGTA,  
771 1 mM  $\text{MgCl}_2$ , 10% glycerol, 0.5 mM DTT, and protease inhibitors (Thermo Scientific)). Cells were  
772 lysed with the gradual addition of 10% NP-40 to a final concentration of 0.3%, followed by a 10-  
773 minute incubation at  $4^{\circ}\text{C}$ . The lysate was then centrifuged at 27,000  $g$  at  $4^{\circ}\text{C}$  for 10 minutes,  
774 and the resulting supernatant was centrifuged at 100,000  $g$  for 1 hour at  $4^{\circ}\text{C}$ . The high-speed  
775 supernatant was next incubated with anti-GFP-antibody-coupled beads (*Ding, et al., 2016; Hsu,*  
776 *et al., 2019; Kanie, et al., 2017; Li, Bin, et al., 2017; Torres, et al., 2009; Wright, et al., 2011*) for  
777 1 hour at  $4^{\circ}\text{C}$  to capture GFP-tagged proteins. The beads were washed five times with LAP200N  
778 buffer (200 mM KCl, 50 mM HEPES-KOH (pH 7.4), 1 mM EGTA, 1 mM  $\text{MgCl}_2$ , 10% glycerol,  
779 protease inhibitors, and 0.05% NP40) and incubated with PreScission protease in LAP200N  
780 buffer at  $4^{\circ}\text{C}$  for 16 hours. All subsequent steps were performed in a laminar flow hood.  
781 PreScission protease-eluted supernatant was added to S-protein agarose beads (EMD Millipore,  
782 Burlington, MA) and incubated rocking for 3 hours at  $4^{\circ}\text{C}$ . S-protein agarose beads were then  
783 washed three times with LAP200N buffer and twice with LAP100 buffer (100 mM KCl, 50 mM  
784 HEPES-KOH (pH 7.4), 1 mM EGTA and 10% glycerol). Beads were stored in 50mM HEPES (pH  
785 7.5), 1 mM EGTA, 1 mM  $\text{MgCl}_2$ , 10% glycerol at  $4^{\circ}\text{C}$  prior to on-bead digestion.

786 Proteins were eluted from S-protein agarose beads with an on-bead reduction, alkylation,  
787 and tryptic digestion as follows. Samples were reduced with 10 mM DTT in ammonium  
788 bicarbonate for an initial 5-minute incubation at  $55^{\circ}\text{C}$  followed by 25 minutes at room temperature.

789 The proteins were then alkylated with a 30-minute incubation in 30 mM acrylamide at room  
790 temperature, and finally eluted from the beads with an overnight digest performed at room  
791 temperature using Trypsin/LysC (Promega) and 0.02% ProteaseMax (Promega). The digests  
792 were acidified with 1% formic acid, de-salted with C18 Monospin reversed phase columns (GL  
793 Sciences, Tokyo, Japan), dried on a SpeedVac, and reconstituted in 12.5  $\mu$ L of 2% acetonitrile  
794 and 0.1% formic acid. 4  $\mu$ L of each sample were used for liquid-chromatography-mass  
795 spectrometry analyses performed on an Acquity M-Class UPLC (Waters Corporation, Milford, MA)  
796 and either an Orbitrap Q-Exactive HFX mass spectrometer (Thermo Scientific, San Jose, CA) or  
797 an Orbitrap Fusion Tribrid mass spectrometer (Thermo Scientific). For each biological replicate,  
798 the sample from the ARHGAP36 L317P-expressing cells was run immediately before that of the  
799 wild-type ARHGAP36-expressing cells. Analysis of the resulting .RAW data files was conducted  
800 using Byonic (Protein Metrics, San Carlos, CA), with the assumption of tryptic proteolysis and a  
801 maximum allowance of two missed cleavage sites. Precursor and MS/MS fragment mass  
802 accuracies were held within 12 ppm and 0.4 Da, respectively. A false discovery rate of 1% was  
803 used for protein identification (*Elias, et al., 2007*). Raw data have been deposited to the  
804 ProteomeXchange Consortium via the PRIDE partner repository with the dataset identifier  
805 PXD019056 and 10.6019/PXD019056.

806 The resulting list of identified proteins was compared to an NCBI FASTA database  
807 containing all mouse proteomic isoforms with the exception of the tandem affinity bait construct  
808 sequence and common contaminant proteins. Post-processing of spectral counts was conducted  
809 with an in-house R script (Supplementary File 5). For each protein, spectral counts detected  
810 across all isoforms were combined and normalized to the mean amino acid length of all isoforms.  
811 The resulting normalized spectral count was divided by the sum of normalized spectral counts  
812 calculated for all proteins in the pulldown sample, generating a normalized spectral abundance  
813 factor (NSAF) for each protein. To account for variability in bait ARHGAP36 expression across



814 different pulldown samples, the NSAF of each protein was divided by that of the bait ARHGAP36  
815 (relative NSAF). Proteins that were detected in all biological replicates for a given condition were  
816 tabulated, resulting in a dataset of 566 candidate ARHGAP36-binding proteins. For each protein,  
817 the fold-change in relative NSAF between the wild-type and L317P mutant ARHGAP36 pulldown  
818 samples of the same replicate was calculated. The average fold-change in relative NSAF across  
819 of all three replicates was then calculated for each protein.

820 To assess the robustness of our comparative interactome analyses, we calculated a  
821 modified Z score that compares the protein enrichment in either interactome (wild-type vs. L317P  
822 ARHGAP36) against the experimental variability in protein abundance measurements. Protein  
823 enrichment was represented by the  $\log_2$ -transformation of the average fold change in relative  
824 NSAF between wild-type and L317P ARHGAP36 interactomes [ $\log_2$  (WT NSAF:L317 NSAF)]. We  
825 estimated the error in measuring protein abundance in a given interactome by normalizing the  
826 relative NSAFs for each replicate to the average value across all three replicates (mean-  
827 normalized relative NSAFs). This transformation approximates how much the variation between  
828 replicates can contribute to an apparent fold change. To place equal weight on upward and  
829 downward variations from the mean, we calculated the absolute value of the  $\log_2$ -transformed  
830 mean-normalized relative NSAFs. These calculations were conducted for the relative NSAFs of  
831 a protein in both the wild-type and L317P mutant ARHGAP36 interactomes, and the two resulting  
832 values were summed to produce a final error estimate. The modified Z score of each protein was  
833 calculated by dividing the  $\log_2$  (WT NSAF:L317 NSAF) by the final error estimate and then  
834 calculating the absolute value of the resulting quotient. Proteins with higher modified Z scores are  
835 those that are enriched in a given interactome to a degree that is greater than the estimated  
836 experimental error.

837

838

839 *Statistical analyses*

840           Biological replicates are defined as experimental samples that are capable of biological  
841 variance, and technical replicates are defined as those for which experimental variance is solely  
842 dependent on measurement accuracy.

843

844 **SUPPLEMENTAL DATA**

845 Figure 4 – figure supplement 1

846 Figure 6 – figure supplement 1

847 Supplementary File 1. Mutation frequencies in pre- and post-selection populations

848 Supplementary File 2. Wild-type and L317P ARHGAP36 isoform 2 interactomes

849 Supplementary File 3. Antibody and primer resources

850 Supplementary File 4. Python script for ARHGAP36 mutagenesis screen analysis

851 Supplementary File 5. R script for ARHGAP36-LAP mass spectrometry analysis

852

853 **ACKNOWLEDGEMENTS**

854 This work was supported by the National Institutes of Health (R35 GM127030 to J.K.C.;  
855 S10 RR025518-01 and S10 RR027431-01 to the Stanford Shared FACS Facility; and P30  
856 CA124435 to Stanford University Mass Spectrometry), the Rachel Molly Markoff Foundation  
857 (J.K.C.), and an Alex's Lemonade Stand Foundation Young Investigator Award (J.N.). Cell sorting  
858 and flow cytometry analyses were conducted at the Stanford Shared FACS Facility. Deep  
859 sequencing analyses were performed at the Stanford Functional Genomics Facility. Quantitative  
860 proteomics were executed at the Vincent Coates Foundation Mass Spectrometry Laboratory,  
861 Stanford University Mass Spectrometry.

862

863 **AUTHOR CONTRIBUTIONS**

864 P.R. N. designed and conducted experiments, analyzed the data, and wrote the paper.  
865 T.K. developed software to analyze deep sequencing data. N.A.M. performed tandem affinity  
866 purifications. J.N. generated expression vectors for ARHGAP36 isoforms and isoform 2 truncation  
867 mutants. J.D. contributed to the development of software to analyze proteomic data. P.K.J.

868 provided resources and supervision for proteomics experiments. J.K.C. designed the  
869 experiments, analyzed the data, and wrote the paper.

870

871 **COMPETING FINANCIAL INTERESTS**

872 The authors declare no competing financial interests.

873

874 **REFERENCES**

- 875 Ågren, M., Kogerman, P., Kleman, M.I., Wessling, M. & Toftgård, R. 2004. Expression of the  
876 PTCH1 tumor suppressor gene is regulated by alternative promoters and a single  
877 functional Gli-binding site. *Gene* **330**: 101-114. doi:  
878 <https://doi.org/10.1016/j.gene.2004.01.010>.
- 879 Amin, E. *et al.* 2016. Deciphering the molecular and functional basis of RHOGAP family proteins:  
880 A systematic approach toward selective inactivation of RHO family proteins. *Journal of*  
881 *Biological Chemistry* **291**: 20353-20371. doi: <https://doi.org/10.1074/jbc.M116.736967>.
- 882 Bai, C.B., Stephen, D. & Joyner, A.L. 2004. All mouse ventral spinal cord patterning by Hedgehog  
883 is Gli dependent and involves an activator function of Gli3. *Developmental Cell* **6**: 103-  
884 115. doi: [https://doi.org/10.1016/S1534-5807\(03\)00394-0](https://doi.org/10.1016/S1534-5807(03)00394-0).
- 885 Barzi, M., Berenguer, J., Menendez, A., Alvarez-Rodriguez, R. & Pons, S. 2009. Sonic-  
886 hedgehog-mediated proliferation requires the localization of PKA to the cilium base.  
887 *Journal of Cell Science* **123**: 62-69. doi: <https://doi.org/10.1242/jcs.060020>, PMID:  
888 5661997.
- 889 Beauchamp, E. *et al.* 2009. GLI1 is a direct transcriptional target of EWS-FLI1 oncoprotein. *The*  
890 *Journal of Biological Chemistry* **284**: 9074-9082. doi:  
891 <https://doi.org/10.1074/jbc.M806233200>, PMID: 19189974.
- 892 Beckmann, P.J. *et al.* 2019. Sleeping beauty insertional mutagenesis reveals important genetic  
893 drivers of central nervous system embryonal tumors. *Cancer Research* **79**: 905-917. doi:  
894 <https://doi.org/10.1158/0008-5472.CAN-18-1261>, PMID: 30674530.
- 895 Breslow, D.K. *et al.* 2018. A CRISPR-based screen for Hedgehog signaling provides insights into  
896 ciliary function and ciliopathies. *Nature Genetics* **50**: 460-471. doi:  
897 <https://doi.org/10.1038/s41588-018-0054-7>.

- 898 Briscoe, J., Pierani, A., Jessell, T.M. & Ericson, J. 2000. A homeodomain protein code specifies  
899 progenitor cell identity and neuronal fate in the ventral neural tube. *Cell* **101**: 435-445. doi:  
900 [https://doi.org/10.1016/S0092-8674\(00\)80853-3](https://doi.org/10.1016/S0092-8674(00)80853-3), PMID: 10830170.
- 901 Buonamici, S. *et al.* 2010. Interfering with resistance to smoothed antagonists by inhibition of  
902 the PI3K pathway in medulloblastoma. *Sci. Transl. Med.* 10.1126/scitranslmed.3001599  
903 51-70. doi: <https://doi.org/10.1126/scitranslmed.3001599>, PMID: 20881279.
- 904 Chávez, M. *et al.* 2015. Modulation of ciliary phosphoinositide content regulates trafficking and  
905 Sonic Hedgehog signaling output. *Developmental Cell* **34**: 338-350. doi:  
906 <https://doi.org/10.1016/j.devcel.2015.06.016>.
- 907 Chen, J.K., Taipale, J., Young, K.E., Maiti, T. & Beachy, P.A. 2002. Small molecule modulation  
908 of Smoothened activity. *Proceedings of the National Academy of Sciences of the United*  
909 *States of America* **99**: 14071-14076. doi: <https://doi.org/10.1073/pnas.182542899>.
- 910 Dai, P. *et al.* 1999. Sonic hedgehog-induced activation of the Gli1 promoter is mediated by GLI3.  
911 *Journal of Biological Chemistry* **274**: 8143-8152. doi:  
912 <https://doi.org/10.1074/jbc.274.12.8143>.
- 913 Dennler, S. *et al.* 2007. Induction of sonic hedgehog mediators by transforming growth factor-  
914 beta: Smad3-dependent activation of Gli2 and Gli1 expression in vitro and in vivo. *Cancer*  
915 *Research* **67**: 6981-6986. doi: <https://doi.org/10.1158/0008-5472.CAN-07-0491>, PMID:  
916 17638910.
- 917 Ding, S. *et al.* 2016. Comparative proteomics reveals strain-specific  $\beta$ -TrCP degradation via  
918 rotavirus NSP1 hijacking a host Cullin-3-Rbx1 complex. *PLoS Pathogens* **12**: e1005929.  
919 doi: <https://doi.org/10.1371/journal.ppat.1005929>.
- 920 Dorn, K.V., Hughes, C.E. & Rohatgi, R. 2012. A Smoothened-Evc2 complex transduces the  
921 Hedgehog signal at primary cilia. *Developmental Cell* **23**: 823-835. doi:  
922 <https://doi.org/10.1016/j.devcel.2012.07.004>.

- 923 Eccles, R.L. *et al.* 2016. Bimodal antagonism of PKA signalling by ARHGAP36. *Nature*  
924 *Communications* **7**: 12963. doi: <https://doi.org/10.1038/ncomms12963>, PMID: 27713425.
- 925 Elias, J.E. & Gygi, S.P. 2007. Target-decoy search strategy for increased confidence in large-  
926 scale protein identifications by mass spectrometry. *Nature Methods* **4**: 207-214. doi:  
927 <https://doi.org/10.1038/nmeth1019>.
- 928 Elsawa, S.F. *et al.* 2011. GLI2 transcription factor mediates cytokine cross-talk in the tumor  
929 microenvironment. *Journal of Biological Chemistry* **286**: 21524-21534. doi:  
930 <https://doi.org/10.1074/jbc.M111.234146>.
- 931 Faucherre, A. *et al.* 2003. Lowe syndrome protein OCRL1 interacts with Rac GTPase in the trans-  
932 Golgi network. *Human Molecular Genetics* **12**: 2449-2456. doi:  
933 <https://doi.org/10.1093/hmg/ddg250>.
- 934 Flora, A., Klisch, T.J., Schuster, G. & Zoghbi, H.Y. 2009. Deletion of Atoh1 disrupts Sonic  
935 Hedgehog signaling in the developing cerebellum and prevents medulloblastoma. *Science*  
936 **326**: 1424-1427. doi: <https://doi.org/10.1126/science.1181453>, PMID: 19965762.
- 937 Garcia-Gonzalo, F.R. *et al.* 2015. Phosphoinositides regulate ciliary protein trafficking to  
938 modulate Hedgehog signaling. *Developmental Cell* **34**: 400-409. doi:  
939 <https://doi.org/10.1016/j.devcel.2015.08.001>.
- 940 Han, B. *et al.* 2015. FOXC1 activates Smoothed-independent Hedgehog signaling in basal-  
941 like breast cancer. *Cell Reports* **13**: 1046-1058. doi:  
942 <https://doi.org/10.1016/j.celrep.2015.09.063>.
- 943 Haycraft, C.J. *et al.* 2005. Gli2 and Gli3 localize to cilia and require the intraflagellar transport  
944 protein Polaris for processing and function. *PLoS Genetics* **1**: e53. doi:  
945 <https://doi.org/10.1371/journal.pgen.0010053>.



- 946 Heldwein, E.E. *et al.* 2004. Crystal structure of the clathrin adaptor protein 1 core. *Proceedings*  
947 *of the National Academy of Sciences of the United States of America* **101**: 14108-14113.  
948 doi: <https://doi.org/10.1073/pnas.0406102101>.
- 949 Hill, P., Götz, K. & Rütger, U. 2009. A SHH-independent regulation of Gli3 is a significant  
950 determinant of anteroposterior patterning of the limb bud. *Developmental Biology* **328**:  
951 506-516. doi: <https://doi.org/10.1016/j.ydbio.2009.02.017>.
- 952 Hsu, J. *et al.* 2019. E2F4 regulates transcriptional activation in mouse embryonic stem cells  
953 independently of the RB family. *Nature Communications* **10**: 2939. doi:  
954 <https://doi.org/10.1038/s41467-019-10901-x>.
- 955 Huangfu, D. & Anderson, K.V. 2005. Cilia and Hedgehog responsiveness in the mouse.  
956 *Proceedings of the National Academy of Sciences of the United States of America* **102**:  
957 11325-11330. doi: <https://doi.org/10.1073/pnas.0505328102>.
- 958 Hui, C.-c. & Angers, S. 2011. Gli proteins in development and disease. *Annual Review of Cell*  
959 *and Developmental Biology* **27**: 513-537. doi: [https://doi.org/10.1146/annurev-cellbio-](https://doi.org/10.1146/annurev-cellbio-092910-154048)  
960 [092910-154048](https://doi.org/10.1146/annurev-cellbio-092910-154048), PMID: 21801010.
- 961 Humke, E.W., Dorn, K.V., Milenkovic, L., Scott, M.P. & Rohatgi, R. 2010. The output of Hedgehog  
962 signaling is controlled by the dynamic association between Suppressor of Fused and the  
963 Gli proteins. *Genes & Development* **24**: 670-682. doi:  
964 <https://doi.org/10.1101/gad.1902910>, PMID: 20360384.
- 965 Huttlin, E.L. *et al.* 2017. Architecture of the human interactome defines protein communities and  
966 disease networks. *Nature* **545**: 505-509. doi: <https://doi.org/10.1038/nature22366>, PMID:  
967 28514442.
- 968 Hyman, J.M. *et al.* 2009. Small-molecule inhibitors reveal multiple strategies for Hedgehog  
969 pathway blockade. *Proceedings of the National Academy of Sciences of the United States*

- 970 *of America* **106**: 14132-14137. doi: <https://doi.org/10.1073/pnas.0907134106>, PMID:  
971 19666565.
- 972 Incardona, J.P. *et al.* 2000. Receptor-mediated endocytosis of soluble and membrane-tethered  
973 sonic hedgehog by patched-1. *Proceedings of the National Academy of Sciences of the*  
974 *United States of America* **97**: 12044-12049. doi: <https://doi.org/10.1073/pnas.220251997>.
- 975 Jaeken, J. *et al.* 2006. Deletion of PREPL, a gene encoding a putative serine oligopeptidase, in  
976 patients with hypotonia-cystinuria syndrome. *American Journal of Human Genetics* **78**:  
977 38-51. doi: <https://doi.org/10.1086/498852>, PMID: 16385448.
- 978 Kanie, T. *et al.* 2017. The CEP19-RABL2 GTPase complex binds IFT-B to initiate intraflagellar  
979 transport at the ciliary base. *Developmental Cell* **42**: 22-36.e12. doi:  
980 <https://doi.org/10.1016/j.devcel.2017.05.016>.
- 981 Kasper, M. *et al.* 2006. Selective modulation of Hedgehog/GLI target gene expression by  
982 epidermal growth factor signaling in human keratinocytes. *Molecular and Cellular Biology*  
983 **26**: 6283-6298. doi: <https://doi.org/10.1128/mcb.02317-05>.
- 984 Kim, J., Kato, M. & Beachy, P.A. 2009. Gli2 trafficking links Hedgehog-dependent activation of  
985 Smoothened in the primary cilium to transcriptional activation in the nucleus. *Proceedings*  
986 *of the National Academy of Sciences of the United States of America* **106**: 21666-21671.  
987 doi: <https://doi.org/10.1073/pnas.0912180106>, PMID: 19996169.
- 988 Langmead, B. & Salzberg, S.L. 2012. Fast gapped-read alignment with Bowtie 2. *Nature Methods*  
989 **9**: 357-359. doi: <https://doi.org/10.1038/nmeth.1923>, PMID: 22388286.
- 990 Lee, Y.s. *et al.* 2019. A computational framework for genome-wide characterization of the human  
991 disease landscape. *Cell Systems* **8**: 152-162. doi:  
992 <https://doi.org/10.1016/j.cels.2018.12.010>.
- 993 Lewis, P.M., Gritli-Linde, A., Smeyne, R., Kottmann, A. & McMahon, A.P. 2004. Sonic hedgehog  
994 signaling is required for expansion of granule neuron precursors and patterning of the

- 995 mouse cerebellum. *Developmental Biology* **270**: 393-410. doi:  
996 <https://doi.org/10.1016/j.ydbio.2004.03.007>, PMID: 15183722.
- 997 Li, B. *et al.* 2017. Drebrin restricts rotavirus entry by inhibiting dynamin-mediated endocytosis.  
998 *Proceedings of the National Academy of Sciences of the United States of America* **114**:  
999 E3642-E3651. doi: <https://doi.org/10.1073/pnas.1619266114>.
- 1000 Li, H. *et al.* 2009. The Sequence Alignment/Map format and SAMtools. *Bioinformatics* **25**: 2078-  
1001 2079. doi: <https://doi.org/10.1093/bioinformatics/btp352>, PMID: 19505943.
- 1002 Lignitto, L. *et al.* 2013. Proteolysis of MOB1 by the ubiquitin ligase praja2 attenuates Hippo  
1003 signalling and supports glioblastoma growth. *Nature Communications* **4**: 1822. doi:  
1004 <https://doi.org/10.1038/ncomms2791>.
- 1005 Lignitto, L. *et al.* 2011. Control of PKA stability and signalling by the RING ligase praja2. *Nature*  
1006 *Cell Biology* **13**: 412-422. doi: <https://doi.org/10.1038/ncb2209>.
- 1007 Liu, A., Wang, B. & Niswander, L.A. 2005. Mouse intraflagellar transport proteins regulate both  
1008 the activator and repressor functions of Gli transcription factors. *Development* **132**: 3103-  
1009 3111. doi: <https://doi.org/10.1242/dev.01894>.
- 1010 Liu, Z., Li, T., Reinhold, M.I. & Naski, M.C. 2014. MEK1-RSK2 contributes to Hedgehog signaling  
1011 by stabilizing GLI2 transcription factor and inhibiting ubiquitination. *Oncogene* **33**: 65-73.  
1012 doi: <https://doi.org/10.1038/onc.2012.544>, PMID: 23208494.
- 1013 Long, J. *et al.* 2014. The BET bromodomain inhibitor I-BET151 acts downstream of smoothed  
1014 protein to abrogate the growth of hedgehog protein-driven cancers. *Journal of Biological*  
1015 *Chemistry* **289**: 35494-35502. doi: <https://doi.org/10.1074/jbc.M114.595348>.
- 1016 Marchesi, S. *et al.* 2014. DEPDC1B coordinates de-adhesion events and cell-cycle progression  
1017 at mitosis. *Developmental Cell* **31**: 420-433. doi:  
1018 <https://doi.org/10.1016/j.devcel.2014.09.009>.

- 1019 May, S.R. *et al.* 2005. Loss of the retrograde motor for IFT disrupts localization of Smo to cilia  
1020 and prevents the expression of both activator and repressor functions of Gli.  
1021 *Developmental Biology* **287**: 378-389. doi: <https://doi.org/10.1016/j.ydbio.2005.08.050>,  
1022 PMID: 16229832.
- 1023 Moon, S. 2003. Rho GTPase-activating proteins in cell regulation. *Trends in Cell Biology* **13**: 13-  
1024 22. doi: [https://doi.org/10.1016/S0962-8924\(02\)00004-1](https://doi.org/10.1016/S0962-8924(02)00004-1).
- 1025 Moore, B.S. *et al.* 2016. Cilia have high cAMP levels that are inhibited by Sonic Hedgehog-  
1026 regulated calcium dynamics. *Proceedings of the National Academy of Sciences of the*  
1027 *United States of America* **113**: 13069-13074. doi:  
1028 <https://doi.org/10.1073/pnas.1602393113>, PMID: 27799542.
- 1029 Mukhopadhyay, S. *et al.* 2013. The ciliary G-protein-coupled receptor Gpr161 negatively  
1030 regulates the Sonic hedgehog pathway via cAMP signaling. *Cell* **152**: 210-223. doi:  
1031 <https://doi.org/10.1016/j.cell.2012.12.026>, PMID: 23332756.
- 1032 Müller, P.M. *et al.* 2020. Systems analysis of RhoGEF and RhoGAP regulatory proteins reveals  
1033 spatially organized RAC1 signalling from integrin adhesions. *Nature Cell Biology* **22**: 498–  
1034 511. doi: <https://doi.org/10.1038/s41556-020-0488-x>, PMID: 32203420.
- 1035 Murone, M., Rosenthal, A. & De Sauvage, F.J. 1999. Sonic hedgehog signaling by the patched-  
1036 smoothed receptor complex. *Current Biology* **9**: 76-84. doi:  
1037 [https://doi.org/10.1016/S0960-9822\(99\)80018-9](https://doi.org/10.1016/S0960-9822(99)80018-9), PMID: 10021362.
- 1038 Nam, H. *et al.* 2019. Critical roles of ARHGAP36 as a signal transduction mediator of shh pathway  
1039 in lateral motor columnar specification. *eLife* **8**: e46683. doi:  
1040 <https://doi.org/10.7554/eLife.46683>.
- 1041 Pan, Y., Bai, C.B., Joyner, A.L. & Wang, B. 2006. Sonic hedgehog signaling regulates Gli2  
1042 transcriptional activity by suppressing its processing and degradation. *Molecular and*

- 1043 *Cellular Biology* **26**: 3365-3377. doi: <https://doi.org/10.1128/MCB.26.9.3365-3377.2006>,
- 1044 PMID: 16611981.
- 1045 Pan, Y. & Wang, B. 2007. A novel protein-processing domain in Gli2 and Gli3 differentially blocks
- 1046 complete protein degradation by the proteasome. *The Journal of Biological Chemistry*
- 1047 **282**: 10846-10852. doi: <https://doi.org/10.1074/jbc.M608599200>, PMID: 17283082.
- 1048 Pedersen, L.B., Mogensen, J.B. & Christensen, S.T. 2016. Endocytic control of cellular signaling
- 1049 at the primary cilium. *Trends in Biochemical Sciences* **41**: 787-797. doi:
- 1050 <https://doi.org/10.1016/j.tibs.2016.06.002>.
- 1051 Pusapati, G.V. *et al.* 2018. CRISPR screens uncover genes that regulate target cell sensitivity to
- 1052 the morphogen Sonic Hedgehog. *Developmental Cell* **44**: 113-129.e118. doi:
- 1053 <https://doi.org/10.1016/j.devcel.2017.12.003>.
- 1054 Rack, P.G. *et al.* 2014. Arhgap36-dependent activation of Gli transcription factors. *Proceedings*
- 1055 *of the National Academy of Sciences of the United States of America* **111**: 11061-11066.
- 1056 doi: <https://doi.org/10.1073/pnas.1322362111>, PMID: 25024229.
- 1057 Radhakrishnan, K., Baltés, J., Creemers, J.W.M. & Schu, P. 2013. Trans-Golgi network
- 1058 morphology and sorting is regulated by prolyl-oligopeptidase-like protein PREPL and the
- 1059 AP-1 complex subunit  $\mu$ 1A. *Journal of Cell Science* **126**: 1155-1163. doi:
- 1060 <https://doi.org/10.1242/jcs.116079>.
- 1061 Riobó, N.A., Lu, K., Ai, X., Haines, G.M. & Emerson, C.P. 2006. Phosphoinositide 3-kinase and
- 1062 Akt are essential for Sonic Hedgehog signaling. *Proceedings of the National Academy of*
- 1063 *Sciences of the United States of America* **103**: 4505-4510. doi:
- 1064 <https://doi.org/10.1073/pnas.0504337103>, PMID: 16537363.
- 1065 Rohatgi, R., Milenkovic, L. & Scott, M.P. 2007. Patched1 regulates hedgehog signaling at the
- 1066 primary cilium. *Science* **317**: 372-376. doi: <https://doi.org/10.1126/science.1139740>,
- 1067 PMID: 17641202.

- 1068 Scheffzek, K., Ahmadian, M.R. & Wittinghofer, A. 1998. GTPase-activating proteins: helping  
1069 hands to complement an active site. *Trends in Biochemical Sciences* **23**: 257-262. doi:  
1070 [https://doi.org/10.1016/S0968-0004\(98\)01224-9](https://doi.org/10.1016/S0968-0004(98)01224-9).
- 1071 Schindelin, J. *et al.* 2012. Fiji: An open-source platform for biological-image analysis. *Nature*  
1072 *Methods* **9**: 676-682. doi: <https://doi.org/10.1038/nmeth.2019>, PMID: 22743772.
- 1073 Schulz, I. *et al.* 2002. Modulation of inositol 1,4,5-triphosphate concentration by prolyl  
1074 endopeptidase inhibition. *European Journal of Biochemistry* **269**: 5813-5820. doi:  
1075 <https://doi.org/10.1046/j.1432-1033.2002.03297.x>, PMID: 12444969.
- 1076 Sepe, M. *et al.* 2014. Proteolytic control of neurite outgrowth inhibitor NOGO-A by the cAMP/PKA  
1077 pathway. *Proceedings of the National Academy of Sciences of the United States of*  
1078 *America* **111**: 15729-15734. doi: <https://doi.org/10.1073/pnas.1410274111>.
- 1079 Stamatakis, D., Ulloa, F., Tsoni, S.V., Mynett, A. & Briscoe, J. 2005. A gradient of Gli activity  
1080 mediates graded Sonic Hedgehog signaling in the neural tube. *Genes & Development* **19**:  
1081 626-641. doi: <https://doi.org/10.1101/gad.325905>.
- 1082 Stone, D.M. *et al.* 1996. The tumour-suppressor gene patched encodes a candidate receptor for  
1083 Sonic hedgehog. *Nature* **384**: 129-134. doi: <https://doi.org/10.1038/384129a0>.
- 1084 Stone, D.M. *et al.* 1999. Characterization of the human Suppressor of fused a negative regulator  
1085 of the zinc-finger transcription factor Gli. *Journal of Cell Science* **112**: 4437-4448. PMID:  
1086 10564661.
- 1087 Szeltner, Z., Alshafee, I., Juhász, T., Parvari, R. & Polgár, L. 2005. The PREPL A protein, a new  
1088 member of the prolyl oligopeptidase family, lacking catalytic activity. *Cellular and*  
1089 *Molecular Life Sciences* **62**: 2376-2381. doi: <https://doi.org/10.1007/s00018-005-5262-5>.
- 1090 Taipale, J. *et al.* 2000. Effects of oncogenic mutations in Smoothed and Patched can be  
1091 reversed by cyclopamine. *Nature* **406**: 1005-1009. doi: <https://doi.org/10.1038/35023008>,  
1092 PMID: 10984056.

- 1093 Taipale, J., Cooper, M.K., Maiti, T. & Beachy, P.A. 2002. Patched acts catalytically to suppress  
1094 the activity of smoothened. *Nature* **418**: 892-897. doi:  
1095 <https://doi.org/10.1038/nature00989>, PMID: 12192414.
- 1096 te Welscher, P. *et al.* 2002. Progression of vertebrate limb development through SHH-mediated  
1097 counteraction of GLI3. *Science* **298**: 827-830. doi:  
1098 <https://doi.org/10.1126/science.1075620>.
- 1099 Tempe, D., Casas, M., Karaz, S., Blanchet-Tournier, M.-F. & Concordet, J.-P. 2006. Multisite  
1100 protein kinase A and glycogen synthase kinase 3 phosphorylation leads to Gli3  
1101 ubiquitination by SCF  $\beta$ -TrCP. *Molecular and Cellular Biology* **26**: 4316-4326. doi:  
1102 <https://doi.org/10.1128/mcb.02183-05>.
- 1103 Torres, J.Z., Miller, J.J. & Jackson, P.K. 2009. High-throughput generation of tagged stable cell  
1104 lines for proteomic analysis. *Proteomics* **9**: 2888-2891. doi:  
1105 <https://doi.org/10.1002/pmic.200800873>.
- 1106 Tukachinsky, H., Lopez, L.V. & Salic, A. 2010. A mechanism for vertebrate Hedgehog signaling:  
1107 recruitment to cilia and dissociation of SuFu-Gli protein complexes. *The Journal of Cell*  
1108 *Biology* **191**: 415-428. doi: <https://doi.org/10.1083/jcb.201004108>, PMID: 20956384.
- 1109 Tuson, M. *et al.* 2011. Protein kinase A acts at the basal body of the primary cilium to prevent  
1110 Gli2 activation and ventralization of the mouse neural tube. *Development* **138**: 4921-4930.  
1111 doi: <https://doi.org/10.1242/dev.070805>, PMID: 22007132.
- 1112 Vuolo, L., Herrera, A., Torroba, B., Menendez, A. & Pons, S. 2015. Ciliary adenylyl cyclases  
1113 control the Hedgehog pathway. *Journal of Cell Science* **128**: 2928-2937. doi:  
1114 <https://doi.org/10.1242/jcs.172635>.
- 1115 Wallace, V.A. 1999. Purkinje-cell-derived Sonic hedgehog regulates granule neuron precursor  
1116 cell proliferation in the developing mouse cerebellum. *Current Biology* **9**: 445-448. doi:  
1117 [https://doi.org/10.1016/S0960-9822\(99\)80195-X](https://doi.org/10.1016/S0960-9822(99)80195-X).



- 1118 Wang, B. & Li, Y. 2006. Evidence for the direct involvement of  $\beta$ -TrCP in Gli3 protein processing.  
1119 *Proceedings of the National Academy of Sciences of the United States of America* **103**:  
1120 33-38. doi: <https://doi.org/10.1073/pnas.0509927103>.
- 1121 Wang, C., Pan, Y. & Wang, B. 2010. Suppressor of fused and Spop regulate the stability  
1122 processing and function of Gli2 and Gli3 full-length activators but not their repressors.  
1123 *Development* **137**: 2001-2009. doi: <https://doi.org/10.1242/dev.052126>, PMID: 20463034.
- 1124 Wang, Y., Zhou, Z., Walsh, C.T. & McMahon, A.P. 2009. Selective translocation of intracellular  
1125 Smoothed to the primary cilium in response to Hedgehog pathway modulation.  
1126 *Proceedings of the National Academy of Sciences of the United States of America* **106**:  
1127 2623-2628. doi: <https://doi.org/10.1073/pnas.0812110106>.
- 1128 Wang, Y.J. *et al.* 2003. Phosphatidylinositol 4 phosphate regulates targeting of clathrin adaptor  
1129 AP-1 complexes to the Golgi. *Cell* **114**: 299-310. doi: [https://doi.org/10.1016/S0092-](https://doi.org/10.1016/S0092-8674(03)00603-2)  
1130 [8674\(03\)00603-2](https://doi.org/10.1016/S0092-8674(03)00603-2), PMID: 12914695.
- 1131 Wechsler-Reya, R. & Scott, M.P. 2001. The developmental biology of brain tumors. *Annual*  
1132 *Review of Neuroscience* **24**: 385-428. doi:  
1133 <https://doi.org/10.1146/annurev.neuro.24.1.385>, PMID: 11283316.
- 1134 Wen, X. *et al.* 2010. Kinetics of Hedgehog-dependent full-length Gli3 accumulation in primary  
1135 cilia and subsequent degradation. *Molecular and Cellular Biology* **30**: 1910-1922. doi:  
1136 <https://doi.org/10.1128/mcb.01089-09>.
- 1137 Williams, R.S.B., Eames, M., Ryves, W.J., Viggars, J. & Harwood, A.J. 1999. Loss of a prolyl  
1138 oligopeptidase confers resistance to lithium by elevation of inositol (1,4,5) trisphosphate.  
1139 *EMBO Journal* **18**: 2734-2745. doi: <https://doi.org/10.1093/emboj/18.10.2734>, PMID:  
1140 10329620.



- 1141 Wright, K.J. *et al.* 2011. An ARL3-UNC119-RP2 GTPase cycle targets myristoylated NPHP3 to  
1142 the primary cilium. *Genes and Development* **25**: 2347-2360. doi:  
1143 <https://doi.org/10.1101/gad.173443.111>, PMID: 22085962.
- 1144 Zhang, B. *et al.* 2019. Patched1-ArhGAP36-PKA-Inversin axis determines the ciliary  
1145 translocation of Smoothed for Sonic Hedgehog pathway activation. *Proceedings of the*  
1146 *National Academy of Sciences of the United States of America* **116**: 874-879. doi:  
1147 <https://doi.org/10.1073/pnas.1804042116>, PMID: 30598432.
- 1148

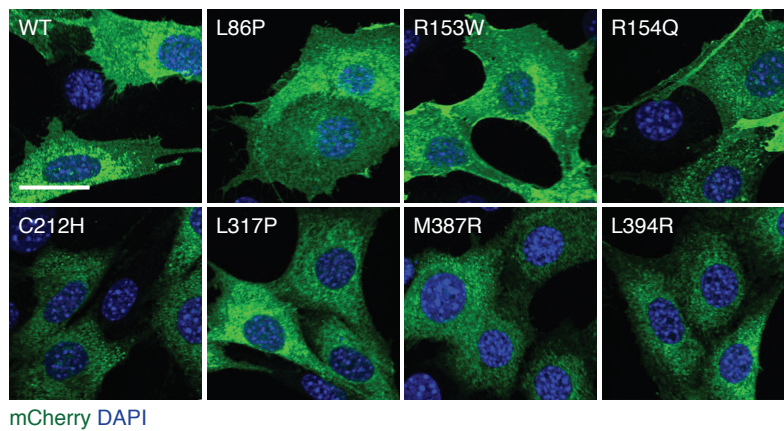

**Figure 4 – figure supplement 1. Subcellular localization of ARHGAP36 isoform 2 point mutants.** Representative immunofluorescence micrographs of SHH-EGFP cells retrovirally transduced with the indicated mCherry-tagged ARHGAP36 constructs. Scale bar: 20  $\mu$ m.

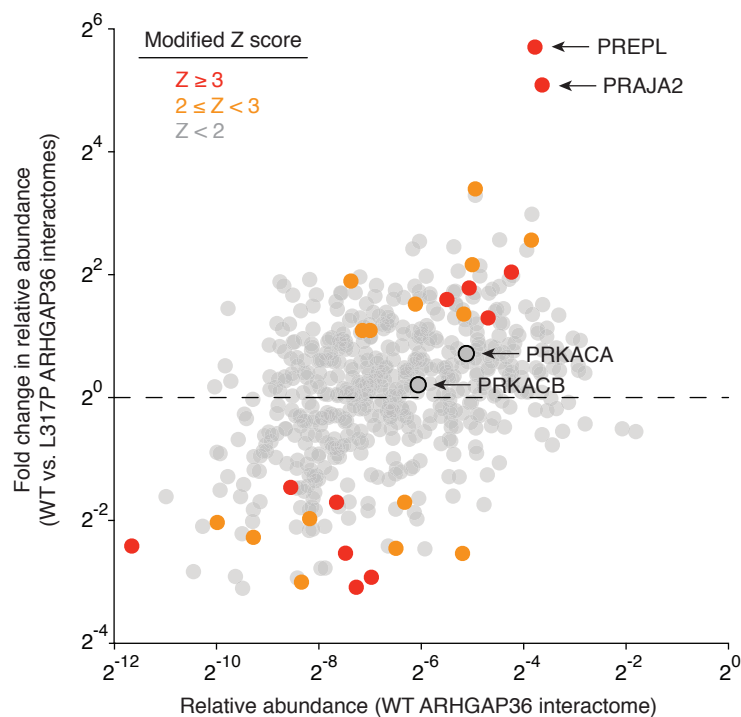

**Figure 6 – figure supplement 1. Comparative analyses of the wild-type and L317P ARHGAP36 interactomes.** Scatter plot of ARHGAP36 isoform 2-binding proteins according to their normalized spectral abundance in the wild-type and L317P interactomes. Each data point represents the average value for three biological replicates, and a modified Z-score was calculated for each fold change in abundance (see Methods).
